# Supplementary material for: Mechanistic Insights Into the Cross-Feeding of Ruminococcus gnavus and Ruminococcus bromii on Host and Dietary Carbohydrates
Source: PubMed Central journal article supplement (PMC6231298; doi:10.3389/fmicb.2018.02558), 2018-11-05
Supplement: Presentation_1.pdf [file Presentation_1.pdf]

**Table S1:** Primers used to quantify bacteria by qPCR

| Primer name | Sequence                      | Target (16S rRNA gene of:)                | Amplicon size | Reference                     |
|-------------|-------------------------------|-------------------------------------------|---------------|-------------------------------|
| UniF        | GTGSTGCAYGGYYGTCGTCA          | All bacteria                              | 147-148nt     | (Fuller et al., 2007)         |
| UniR        | ACGTCRTCCMCNCCTTCCTC          |                                           |               |                               |
| Rflbr730F   | GGCGGCYTRCTGGGCTTT            | cluster IV<br><i>Ruminococcus</i><br>spp. | 157nt         | (Ramirez-Farias et al., 2009) |
| Clep866mR   | CCAGGTGGATWACTTATTGTG<br>TTAA |                                           |               |                               |
| 16SRgF      | TGGCGGCGTGCTTAACA             | <i>Ruminococcus</i><br><i>gnavus</i>      | 57nt          | (Joossens et al., 2011)       |
| 16RgR       | TCCGAAGAAATCCGTCAAGGT         |                                           |               |                               |

Fuller, Z., Louis, P., Mihajlovski, A., Rungapamestry, V., Ratcliffe, B., and Duncan, A.J. (2007). Influence of cabbage processing methods and prebiotic manipulation of colonic microflora on glucosinolate breakdown in man. *Br J Nutr* 98(2), 364-372. doi: 10.1017/S0007114507709091.

Joossens, M., Huys, G., Cnockaert, M., De Preter, V., Verbeke, K., Rutgeerts, P., et al. (2011). Dysbiosis of the faecal microbiota in patients with Crohn's disease and their unaffected relatives. *Gut* 60(5), 631-637. doi: 10.1136/gut.2010.223263.

Ramirez-Farias, C., Slezak, K., Fuller, Z., Duncan, A., Holtrop, G., and Louis, P. (2009). Effect of inulin on the human gut microbiota: stimulation of *Bifidobacterium adolescentis* and *Faecalibacterium prausnitzii*. *Br J Nutr* 101(4), 541-550. doi: 10.1017/S0007114508019880.

**Table S2:** Sequences used as reference for genome mining

| Target protein                          | Sequence used as reference: |                                                                                      | NCBI reference sequence? |
|-----------------------------------------|-----------------------------|--------------------------------------------------------------------------------------|--------------------------|
|                                         | Accession number            | Organism                                                                             |                          |
| PduQ                                    | NP_460997.1                 | <i>Salmonella enterica</i> subsp.<br><i>enterica</i> serovar<br>Typhimurium str. LT2 | yes                      |
| PduC                                    | NP_460985.1                 |                                                                                      | yes                      |
| PduD                                    | NP_460986.1                 |                                                                                      | yes                      |
| PduE                                    | NP_460987.1                 |                                                                                      | yes                      |
| Lactaldehyde reductase                  | EDY33573.1                  | <i>Ruminococcus lactaris</i><br>ATCC 29176                                           | no                       |
| PduP                                    | SCY17815.1                  | <i>Blautia</i> sp. SF-50                                                             | no                       |
| acryloyl-CoA reductase                  | GAX63847.1                  | <i>Clostridioides difficile</i>                                                      | no                       |
| methylmalonyl-CoA<br>carboxytransferase | ACJ24327.1                  | <i>Clostridium symbiosum</i>                                                         | no                       |
| FucU                                    | NP_417284.1                 | <i>Escherichia coli</i> str. K-12<br>substr. MG1655                                  | yes                      |
| FucI                                    | NP_417282.1                 |                                                                                      | yes                      |
| FucK                                    | NP_417283.2                 |                                                                                      | yes                      |
| L-fucose-1-phosphate<br>aldolase        | NP_417280.1                 |                                                                                      | yes                      |

**Table S3:** List of differentially expressed *R. bromii* genes

| Gene name:  | Annotation                                        | Rb_SS vs Rb+Rg_SS* |          | Rb_RS vs Rb+Rg_RS* |          | Rb_SS vs Rb_RS* |          | Rb+Rg_SS vs Rb+Rg_RS* |          |
|-------------|---------------------------------------------------|--------------------|----------|--------------------|----------|-----------------|----------|-----------------------|----------|
|             |                                                   | Log2FC**           | padj     | Log2FC             | padj     | Log2FC          | padj     | Log2FC                | padj     |
| L2-63_00114 | gltB Ferredoxin-dependent glutamate synthase 1    | 1.41               | 1.26E-02 | 1.55               | 1.69E-03 | 0.11            | 9.79E-01 | 0.26                  | 7.00E-01 |
| L2-63_00390 | serine/threonine protein kinase                   | -0.18              | 8.41E-01 | -2.3               | 3.31E-10 | 1.02            | 2.59E-01 | -1.1                  | 2.06E-02 |
| L2-63_00637 | trpE Anthranilate synthase component 1            | -3.22              | 1.42E-26 | -3.09              | 7.42E-24 | -0.36           | 8.47E-01 | -0.23                 | 6.29E-01 |
| L2-63_00638 | trpG Anthranilate synthase component II           | -3                 | 3.16E-23 | -2.94              | 9.62E-22 | -0.29           | 9.19E-01 | -0.23                 | 6.33E-01 |
| L2-63_00639 | trpD2 Anthranilate phosphoribosyltransferase 2    | -3.12              | 1.42E-26 | -2.78              | 8.61E-21 | -0.43           | 7.52E-01 | -0.09                 | 8.50E-01 |
| L2-63_00640 | trpC Indole-3-glycerol phosphate synthase         | -3.09              | 1.72E-24 | -2.7               | 2.49E-18 | -0.42           | 7.89E-01 | -0.03                 | 9.58E-01 |
| L2-63_00641 | trpB_2 Tryptophan synthase beta chain             | -3.22              | 7.35E-28 | -2.43              | 1.44E-15 | -0.56           | 6.54E-01 | 0.23                  | 6.31E-01 |
| L2-63_00642 | trpA Tryptophan synthase alpha chain              | -3.23              | 2.06E-28 | -2.37              | 4.53E-15 | -0.53           | 6.61E-01 | 0.34                  | 4.39E-01 |
| L2-63_00643 | cobB NAD-dependent deacetylase                    | -3.3               | 2.71E-29 | -2.22              | 2.98E-13 | -0.64           | 6.03E-01 | 0.44                  | 3.06E-01 |
| L2-63_00722 | metH B12-dependent methionine synthase            | -0.16              | 8.15E-01 | 1.53               | 4.71E-07 | -0.56           | 6.43E-01 | 1.13                  | 1.06E-03 |
| L2-63_00870 | ydjE Inner membrane metabolite transport protein  | 0.29               | 7.65E-01 | -1.66              | 9.62E-04 | 0.78            | 6.54E-01 | -1.17                 | 4.12E-02 |
| L2-63_00871 | gutB Sorbitol dehydrogenase                       | 0.12               | 9.19E-01 | -1.91              | 6.39E-05 | 0.76            | 6.54E-01 | -1.26                 | 2.53E-02 |
| L2-63_00872 | gatY D-tagatose-1,6-bisphosphate aldolase subunit | 0.14               | 8.92E-01 | -2.24              | 4.97E-07 | 0.82            | 6.43E-01 | -1.56                 | 3.06E-03 |
| L2-63_00873 | ydjH Uncharacterized sugar kinase                 | 0.14               | 8.94E-01 | -2.27              | 3.73E-07 | 0.74            | 6.54E-01 | -1.66                 | 1.06E-03 |
| L2-63_00874 | yhdN General stress protein 69                    | 0.05               | 9.66E-01 | -2.54              | 4.92E-09 | 0.77            | 6.54E-01 | -1.82                 | 2.52E-04 |
| L2-63_00875 | glcR_2 HTH-type transcriptional repressor         | -0.19              | 7.68E-01 | -1.69              | 3.54E-08 | 0.25            | 9.33E-01 | -1.25                 | 2.82E-04 |
| L2-63_00876 | gltP Glutamate-aspartate carrier protein          | -0.02              | 9.91E-01 | -1.61              | 2.57E-05 | 0.58            | 6.69E-01 | -1.02                 | 2.70E-02 |
| L2-63_00933 | fus_1 Elongation factor G                         | -0.62              | 3.87E-01 | -2.06              | 8.71E-06 | 0.28            | 9.45E-01 | -1.16                 | 4.03E-02 |
| L2-63_01124 | adhE_2 Aldehyde-alcohol dehydrogenase             | -0.4               | 5.81E-01 | -2.33              | 4.92E-09 | 0.06            | 9.84E-01 | -1.88                 | 2.44E-05 |
| L2-63_01219 | ntpD_1 V-type sodium pump subunit D               | 0                  | 9.99E-01 | -1.61              | 3.79E-06 | -0.13           | 9.69E-01 | -1.74                 | 3.25E-06 |
| L2-63_01220 | ntpB_1 V-type sodium pump subunit B               | -0.01              | 9.92E-01 | -1.68              | 1.19E-06 | -0.15           | 9.60E-01 | -1.82                 | 1.29E-06 |
| L2-63_01221 | ntpA V-type sodium ATPase catalytic subunit A     | 0.05               | 9.62E-01 | -1.66              | 1.80E-05 | -0.14           | 9.69E-01 | -1.85                 | 4.03E-06 |
| L2-63_01222 | ntpG V-type sodium pump subunit G                 | -0.02              | 9.90E-01 | -1.68              | 3.17E-05 | 0.05            | 9.84E-01 | -1.62                 | 2.19E-04 |
| L2-63_01223 | ntpC V-type sodium pump subunit C                 | 0.2                | 8.15E-01 | -1.57              | 6.39E-05 | 0.03            | 9.98E-01 | -1.74                 | 2.44E-05 |
| L2-63_01224 | V-type ATP synthase subunit E                     | 0.13               | 8.83E-01 | -1.59              | 3.17E-05 | 0.08            | 9.81E-01 | -1.63                 | 6.15E-05 |
| L2-63_01225 | ntpK Sodium ATPase proteolipid component          | 0.16               | 8.60E-01 | -1.49              | 2.76E-04 | 0.03            | 9.98E-01 | -1.61                 | 1.85E-04 |
| L2-63_01277 | metK S-adenosylmethionine synthase                | 1.16               | 1.93E-02 | 2.65               | 5.01E-13 | -0.64           | 6.61E-01 | 0.86                  | 7.68E-02 |
| L2-63_01983 | metE 5-methyltetrahydropteroyltryglutamate        | 0.01               | 9.96E-01 | 1.62               | 4.19E-07 | -0.34           | 8.65E-01 | 1.27                  | 3.25E-04 |

\*Condition A vs Condition B: genes with an up-regulated transcription in Condition A (Log2FC>1.5 and padj<0.05) are highlighted in red while those with an up-regulated transcription in Condition B (Log2FC<-1.5 and padj<0.05) are highlighted in green.

\*\*Log2FC: Log2(Fold change in transcription level)

**Table S4:** List of differentially expressed *R. gnavus* genes

| Gene name    | Annotation                                                           | Rg_Glc vs Rb+Rg_SS* |          | Rg_Glc vs Rb+Rg_RS* |          | Rb+Rg_SS vs Rb+Rg_RS* |          |
|--------------|----------------------------------------------------------------------|---------------------|----------|---------------------|----------|-----------------------|----------|
|              |                                                                      | Log2FC**            | padj     | Log2FC**            | padj     | Log2FC**              | padj     |
| RUMGNA_00005 | Hypothetical protein                                                 | -0.79               | 1.80E-01 | 1.06                | 1.10E-02 | 1.85                  | 8.44E-07 |
| RUMGNA_00006 | DNA-binding protein                                                  | -0.73               | 1.77E-01 | 1.8                 | 2.74E-07 | 2.54                  | 2.89E-14 |
| RUMGNA_00044 | Putative integrase                                                   |                     |          | 1.98                | 1.57E-02 | 1.93                  | 1.53E-02 |
| RUMGNA_00047 | Hypothetical protein                                                 | -0.51               | 7.15E-01 | -1.55               | 2.16E-02 | -1.05                 | 1.30E-01 |
| RUMGNA_00071 | Hypothetical protein                                                 | -0.35               | 7.25E-01 | 1.63                | 6.48E-04 | 1.98                  | 1.12E-05 |
| RUMGNA_00095 | Hypothetical protein                                                 | -0.83               | 4.70E-01 | 1.43                | 4.74E-02 | 2.26                  | 4.01E-04 |
| RUMGNA_00100 | Hypothetical protein                                                 | 0.01                | 9.95E-01 | 1.81                | 3.54E-08 | 1.8                   | 5.21E-08 |
| RUMGNA_00258 | stage III sporulation protein AA                                     | -0.05               | 9.80E-01 | -1.52               | 1.93E-03 | -1.48                 | 2.63E-03 |
| RUMGNA_00294 | cation-translocating P-type ATPase                                   | -0.88               | 1.04E-01 | 0.92                | 2.52E-02 | 1.8                   | 6.09E-07 |
| RUMGNA_00358 | SPFH/Band 7/PHB domain protein                                       | -0.23               | 8.41E-01 | -1.55               | 1.68E-03 | -1.32                 | 5.52E-03 |
| RUMGNA_00359 | NfeD family protein                                                  | -0.36               | 7.87E-01 | -1.8                | 3.41E-03 | -1.44                 | 1.58E-02 |
| RUMGNA_00369 | cold shock domain-containing protein                                 | 0.34                | 7.01E-01 | 1.98                | 1.12E-06 | 1.64                  | 4.67E-05 |
| RUMGNA_00385 | Hypothetical protein                                                 | -1.01               | 8.46E-02 | 0.89                | 5.69E-02 | 1.9                   | 2.90E-06 |
| RUMGNA_00409 | transcriptional regulator                                            | -0.32               | 6.92E-01 | 2.11                | 1.56E-07 | 2.43                  | 1.05E-09 |
| RUMGNA_00464 | MerR family transcriptional regulator                                | -0.66               | 3.51E-01 | 1.39                | 1.59E-03 | 2.05                  | 4.09E-07 |
| RUMGNA_00488 | methionine adenosyltransferase                                       |                     |          | 1.53                | 1.16E-01 | 1.97                  | 2.74E-02 |
| RUMGNA_00492 | Hypothetical protein                                                 | 1.22                | 2.41E-01 | -1.24               | 5.59E-02 | -2.45                 | 1.31E-04 |
| RUMGNA_00508 | Hypothetical protein                                                 | -0.03               | 9.88E-01 | 1.77                | 7.51E-03 | 1.8                   | 4.84E-03 |
| RUMGNA_00509 | ABC transporter ATP-binding protein                                  |                     |          | 1.15                | 1.90E-01 | 1.78                  | 2.36E-02 |
| RUMGNA_00510 | ABC transporter permease                                             | -0.02               | 9.88E-01 | 1.54                | 1.64E-03 | 1.56                  | 1.12E-03 |
| RUMGNA_00511 | ABC transporter permease                                             | -0.22               | 8.37E-01 | 1.38                | 5.20E-03 | 1.6                   | 7.45E-04 |
| RUMGNA_00514 | DNA-binding response regulator                                       |                     |          | 1.5                 | 6.78E-02 | 1.62                  | 3.92E-02 |
| RUMGNA_00525 | putative hydroxydechloroatrazine ethylaminohydrolase                 | 0.71                | 6.17E-01 | 2.18                | 4.92E-03 | 1.47                  | 6.29E-02 |
| RUMGNA_00529 | NADH oxidase                                                         | 0.43                | 5.69E-01 | -1.11               | 7.04E-03 | -1.54                 | 4.42E-05 |
| RUMGNA_00530 | AraC family transcriptional regulator                                | 0.24                | 8.05E-01 | -1.28               | 3.28E-03 | -1.51                 | 2.21E-04 |
| RUMGNA_00532 | Hypothetical protein                                                 | 0.46                | 5.98E-01 | -1.72               | 5.35E-05 | -2.18                 | 1.49E-07 |
| RUMGNA_00539 | Hypothetical protein                                                 | -0.7                | 4.94E-01 | 1.73                | 2.95E-03 | 2.43                  | 5.67E-06 |
| RUMGNA_00542 | HTH domain-containing protein; TrmB family transcriptional regulator | -1.12               | 5.54E-05 | 0.8                 | 4.41E-03 | 1.93                  | 5.70E-15 |
| RUMGNA_00585 | 2-isopropylmalate synthase                                           | -1.45               | 1.18E-04 | 0.19                | 7.00E-01 | 1.64                  | 1.79E-06 |
| RUMGNA_00610 | Hypothetical protein                                                 | -0.1                | 9.11E-01 | 2.43                | 1.84E-16 | 2.53                  | 8.08E-18 |
| RUMGNA_00611 | Hypothetical protein                                                 | 0.02                | 9.88E-01 | 2.5                 | 2.73E-09 | 2.48                  | 6.40E-09 |
| RUMGNA_00612 | Hypothetical protein                                                 | -1                  | 2.16E-01 | 1.27                | 3.27E-02 | 2.27                  | 1.64E-05 |
| RUMGNA_00613 | Hypothetical protein                                                 | -1.28               | 4.10E-02 | 1.35                | 1.49E-02 | 2.63                  | 8.71E-08 |
| RUMGNA_00614 | 50S ribosomal protein L20                                            | -0.9                | 1.59E-01 | 0.87                | 6.91E-02 | 1.77                  | 1.90E-05 |
| RUMGNA_00615 | 50S ribosomal protein L35                                            | -0.77               | 3.14E-01 | 1.04                | 4.51E-02 | 1.81                  | 7.21E-05 |

|              |                                                                                 |       |          |       |          |       |          |
|--------------|---------------------------------------------------------------------------------|-------|----------|-------|----------|-------|----------|
| RUMGNA_00616 | translation initiation factor IF-3                                              | -0.77 | 3.92E-01 | 1.22  | 3.27E-02 | 1.99  | 7.90E-05 |
| RUMGNA_00651 | Hypothetical protein                                                            | -0.54 | 5.90E-01 | 1.07  | 5.85E-02 | 1.61  | 1.39E-03 |
| RUMGNA_00652 | XRE family transcriptional regulator                                            | -0.76 | 2.72E-01 | 1.89  | 2.12E-05 | 2.65  | 2.41E-10 |
| RUMGNA_00653 | Hypothetical protein                                                            | 0.21  | 8.62E-01 | 2.39  | 2.19E-07 | 2.18  | 1.68E-06 |
| RUMGNA_00655 | RNA polymerase factor sigma-70                                                  | -0.61 | 2.67E-01 | 1.43  | 4.23E-05 | 2.04  | 4.79E-10 |
| RUMGNA_00656 | 23S rRNA (guanosine(2251)-2'-O)-methyltransferase RlmB                          | -0.51 | 1.96E-01 | 1.06  | 4.88E-05 | 1.56  | 1.38E-10 |
| RUMGNA_00666 | potassium transporter                                                           | -0.9  | 3.10E-01 | 1.32  | 2.68E-02 | 2.22  | 2.69E-05 |
| RUMGNA_00670 | Hypothetical protein                                                            | -0.49 | 5.69E-01 | 1.32  | 6.38E-03 | 1.81  | 5.80E-05 |
| RUMGNA_00672 | DNA-directed RNA polymerase sigma-70 factor AICARFT/IMPCHase bienzyme;          | -0.32 | 8.32E-01 | 1.26  | 8.67E-02 | 1.58  | 2.24E-02 |
| RUMGNA_00681 | phosphoribosylaminoimidazolecarboxamide formyltransferase                       | 1     | 5.62E-01 | -1.14 | 2.78E-01 | -2.14 | 1.70E-02 |
| RUMGNA_00682 | inosine monophosphate cyclohydrolase                                            | 0.89  | 6.12E-01 | -1.04 | 3.31E-01 | -1.94 | 3.39E-02 |
| RUMGNA_00692 | XRE family transcriptional regulator                                            | 0.91  | 1.50E-01 | -1    | 2.84E-02 | -1.91 | 2.93E-06 |
| RUMGNA_00744 | SNF2 family N-terminal domain protein; helicase                                 | 1.13  | 9.08E-02 | -1.72 | 1.93E-04 | -2.85 | 1.51E-10 |
| RUMGNA_00747 | DUF4316 domain-containing protein                                               | -0.05 | 9.79E-01 | 1.54  | 7.96E-03 | 1.6   | 4.23E-03 |
| RUMGNA_00789 | Hypothetical protein                                                            | -1.21 | 7.53E-02 | 0.55  | 3.61E-01 | 1.76  | 2.59E-04 |
| RUMGNA_00792 | 50S ribosomal protein L13                                                       | -0.81 | 1.98E-01 | 1.14  | 9.96E-03 | 1.95  | 9.73E-07 |
| RUMGNA_00793 | Hypothetical protein                                                            | -0.64 | 4.65E-01 | 2.58  | 4.24E-08 | 3.22  | 1.70E-12 |
| RUMGNA_00823 | Hypothetical protein                                                            | -0.45 | 7.35E-01 | 1.43  | 3.39E-02 | 1.87  | 2.12E-03 |
| RUMGNA_00826 | Uncharacterized phosphatase YwpJ or cof-like hydrolase or haloacid dehalogenase | 0.51  | 3.30E-01 | -1.08 | 1.05E-03 | -1.59 | 2.04E-07 |
| RUMGNA_00827 | transcriptional antiterminator BglG                                             | 0.48  | 4.34E-01 | -1.34 | 1.30E-04 | -1.82 | 3.08E-08 |
| RUMGNA_00828 | beta-glucosidase/GH3                                                            | 0.69  | 3.35E-01 | -1.84 | 1.85E-05 | -2.53 | 5.03E-10 |
| RUMGNA_00829 | PTS system sucrose-specific IIBC component                                      | 0.52  | 5.98E-01 | -2.38 | 8.84E-07 | -2.9  | 5.23E-10 |
| RUMGNA_00830 | Sucrose-6-phosphate hydrolase or beta-fructofuranosidase                        | -0.1  | 9.58E-01 | -2.76 | 6.18E-06 | -2.66 | 9.03E-06 |
| RUMGNA_00832 | xylulokinase                                                                    | 0.53  | 4.58E-01 | -2    | 1.19E-07 | -2.53 | 5.58E-12 |
| RUMGNA_00833 | fucose isomerase                                                                | 0.49  | 5.24E-01 | -2.33 | 1.02E-09 | -2.81 | 6.62E-14 |
| RUMGNA_00834 | DUF4867 domain-containing protein                                               | 0.64  | 4.40E-01 | -2.28 | 1.01E-07 | -2.92 | 1.31E-11 |
| RUMGNA_00842 | Fucosidase GH95                                                                 | 2.31  | 2.71E-07 | 1.15  | 1.78E-02 | -1.16 | 1.09E-02 |
| RUMGNA_00854 | DUF4430 domain-containing protein                                               | -0.77 | 2.34E-01 | 0.84  | 7.20E-02 | 1.61  | 7.56E-05 |
| RUMGNA_00856 | Hypothetical protein                                                            | -0.71 | 2.93E-01 | 0.82  | 8.45E-02 | 1.53  | 2.13E-04 |
| RUMGNA_00857 | Hypothetical protein                                                            | -0.13 | 9.03E-01 | 1.97  | 1.74E-07 | 2.1   | 1.06E-08 |
| RUMGNA_00865 | Hypothetical protein                                                            | 0.1   | 9.40E-01 | -5.53 | 4.37E-41 | -5.63 | 3.99E-41 |
| RUMGNA_00873 | 50S ribosomal protein L34                                                       | -0.32 | 7.20E-01 | 1.23  | 6.01E-03 | 1.55  | 1.54E-04 |
| RUMGNA_00874 | ribonuclease P protein component                                                | -0.65 | 3.14E-01 | 1.16  | 6.42E-03 | 1.81  | 2.62E-06 |
| RUMGNA_00875 | membrane protein insertion efficiency factor YidD                               | -0.4  | 6.23E-01 | 1.35  | 1.33E-03 | 1.74  | 7.97E-06 |
| RUMGNA_00876 | membrane protein insertase YidC                                                 | -0.5  | 4.64E-01 | 1.03  | 9.21E-03 | 1.53  | 1.99E-05 |

|              |                                                                              |       |          |       |          |       |          |
|--------------|------------------------------------------------------------------------------|-------|----------|-------|----------|-------|----------|
| RUMGNA_00882 | Hypothetical protein                                                         | -0.22 | 8.58E-01 | 1.47  | 6.13E-03 | 1.69  | 8.86E-04 |
| RUMGNA_00898 | manganese efflux pump                                                        | -0.84 | 1.78E-01 | 0.83  | 7.37E-02 | 1.67  | 4.20E-05 |
| RUMGNA_00904 | Hypothetical protein                                                         | -0.89 | 2.09E-01 | 1.4   | 1.02E-02 | 2.29  | 4.09E-06 |
| RUMGNA_00954 | glutamine synthetase                                                         | -0.38 | 7.02E-01 | -1.56 | 1.24E-03 | -1.18 | 1.25E-02 |
| RUMGNA_00958 | transporter, major facilitator family protein or MFS transporter             | -2.35 | 1.06E-08 | -2.24 | 2.88E-08 | 0.11  | 8.42E-01 |
| RUMGNA_00972 | DNA-binding response regulator                                               | 0.5   | 7.05E-01 | -1.09 | 9.92E-02 | -1.59 | 1.11E-02 |
| RUMGNA_00974 | Hypothetical protein                                                         | 0.71  | 1.64E-01 | -1.68 | 2.07E-07 | -2.39 | 1.96E-14 |
| RUMGNA_00984 | Hypothetical protein                                                         | -0.92 | 3.99E-01 | 0.75  | 3.43E-01 | 1.66  | 1.23E-02 |
| RUMGNA_01004 | AraC family transcriptional regulator                                        | 0.56  | 3.55E-01 | -1.4  | 1.08E-04 | -1.96 | 9.02E-09 |
| RUMGNA_01006 | rhamnulokinase                                                               | 0.83  | 1.11E-01 | -2.71 | 5.96E-19 | -3.54 | 2.72E-28 |
| RUMGNA_01007 | putative L-rhamnose isomerase                                                | 0.38  | 5.46E-01 | -2.3  | 2.76E-15 | -2.68 | 1.85E-19 |
| RUMGNA_01009 | DUF4968 domain-containing protein                                            | 1.35  | 1.31E-02 | -0.17 | 7.79E-01 | -1.53 | 5.99E-04 |
| RUMGNA_01017 | glycyl radical protein                                                       | 0.56  | 1.93E-01 | -2.08 | 9.68E-16 | -2.64 | 4.70E-25 |
| RUMGNA_01018 | glycyl-radical enzyme activating protein                                     | 0.77  | 1.97E-01 | -1.48 | 1.78E-04 | -2.25 | 1.39E-09 |
| RUMGNA_01019 | glycyl-radical enzyme activating protein                                     | 0.82  | 1.88E-01 | -1.71 | 1.06E-05 | -2.53 | 3.42E-11 |
| RUMGNA_01036 | AraC family transcriptional regulator                                        | 1.31  | 1.11E-02 | -0.38 | 4.77E-01 | -1.69 | 5.35E-05 |
| RUMGNA_01045 | mannonate dehydratase                                                        | 0.98  | 6.68E-02 | -1.4  | 1.36E-04 | -2.38 | 6.62E-11 |
| RUMGNA_01046 | mannitol dehydrogenase family protein                                        | 0.67  | 2.16E-01 | -1.45 | 1.69E-05 | -2.12 | 1.37E-10 |
| RUMGNA_01049 | 2-dehydro-3-deoxyphosphogluconate aldolase/4-hydroxy-2-oxoglutarate aldolase | 0.45  | 5.63E-01 | -1.52 | 1.78E-04 | -1.97 | 2.33E-07 |
| RUMGNA_01050 | sugar kinase                                                                 | 0.56  | 4.45E-01 | -1.17 | 7.02E-03 | -1.73 | 1.20E-05 |
| RUMGNA_01063 | ABC transporter permease protein                                             | 2.51  | 3.41E-05 | -0.16 | 8.44E-01 | -2.67 | 1.51E-06 |
| RUMGNA_01064 | sugar ABC transporter ATP-binding protein                                    | 2.41  | 1.15E-04 | 0.02  | 9.86E-01 | -2.4  | 2.69E-05 |
| RUMGNA_01065 | ABC transporter permease protein                                             | 2.43  | 3.11E-04 | 0.32  | 7.06E-01 | -2.11 | 5.99E-04 |
| RUMGNA_01066 | LacI family transcriptional regulator                                        | 2.56  | 1.52E-06 | -0.26 | 7.17E-01 | -2.82 | 1.47E-08 |
| RUMGNA_01067 | Hypothetical protein                                                         | 2.58  | 2.52E-07 | 0.61  | 3.17E-01 | -1.98 | 4.68E-05 |
| RUMGNA_01069 | L-fuculokinase                                                               | 1.36  | 4.69E-03 | -0.92 | 4.56E-02 | -2.28 | 7.73E-09 |
| RUMGNA_01070 | L-fucose isomerase                                                           | 1.37  | 1.76E-04 | -1.01 | 5.45E-03 | -2.38 | 7.23E-14 |
| RUMGNA_01071 | L-fucose mutarotase                                                          | 1.55  | 6.00E-05 | -0.63 | 1.23E-01 | -2.19 | 2.52E-10 |
| RUMGNA_01085 | NAD(P)-dependent alcohol dehydrogenase                                       | 1.94  | 1.18E-04 | 0.71  | 2.05E-01 | -1.23 | 1.06E-02 |
| RUMGNA_01086 | GTP-binding protein                                                          | 1.59  | 9.90E-04 | 0.46  | 4.02E-01 | -1.14 | 1.05E-02 |
| RUMGNA_01106 | Cna B-type domain-containing protein                                         | 0.97  | 3.32E-02 | -0.92 | 1.69E-02 | -1.89 | 2.26E-08 |
| RUMGNA_01115 | 50S ribosomal protein L19                                                    | -0.69 | 3.15E-01 | 1.08  | 1.82E-02 | 1.78  | 1.55E-05 |
| RUMGNA_01116 | tRNA (guanosine(37)-N1)-methyltransferase TrmD                               | -1.34 | 4.48E-02 | 1.01  | 7.59E-02 | 2.35  | 1.74E-06 |
| RUMGNA_01117 | 16S rRNA processing protein RimM                                             | -1.26 | 1.13E-01 | 1.01  | 1.04E-01 | 2.26  | 1.97E-05 |
| RUMGNA_01118 | KH domain-containing protein                                                 | -0.82 | 2.71E-01 | 0.86  | 1.07E-01 | 1.68  | 2.57E-04 |
| RUMGNA_01119 | 30S ribosomal protein S16                                                    | -0.85 | 2.33E-01 | 0.82  | 1.14E-01 | 1.67  | 1.82E-04 |
| RUMGNA_01120 | signal recognition particle protein                                          | -0.84 | 4.14E-01 | 0.98  | 1.48E-01 | 1.82  | 1.80E-03 |
| RUMGNA_01121 | DNA-binding protein                                                          | -0.77 | 4.05E-01 | 1.6   | 4.60E-03 | 2.37  | 3.97E-06 |

|              |                                                                                   |       |          |       |          |       |          |
|--------------|-----------------------------------------------------------------------------------|-------|----------|-------|----------|-------|----------|
| RUMGNA_01165 | Abi family protein                                                                | -0.2  | 8.44E-01 | 1.48  | 7.29E-04 | 1.68  | 4.67E-05 |
| RUMGNA_01171 | Hypothetical protein                                                              | -1.03 | 1.67E-01 | 0.79  | 1.99E-01 | 1.83  | 4.70E-04 |
| RUMGNA_01178 | Hypothetical protein                                                              | 0.81  | 3.37E-01 | -0.78 | 1.47E-01 | -1.6  | 1.70E-03 |
| RUMGNA_01183 | prepilin peptidase                                                                | 0.88  | 7.92E-02 | -1.16 | 1.49E-03 | -2.04 | 1.73E-09 |
| RUMGNA_01184 | PHP domain protein                                                                | 0.34  | 6.49E-01 | -1.67 | 2.00E-06 | -2.01 | 4.58E-09 |
| RUMGNA_01186 | cob(I)yrinic acid a,c-diamide adenosyltransferase                                 | 0.52  | 4.40E-01 | -1.36 | 2.89E-04 | -1.88 | 1.26E-07 |
| RUMGNA_01187 | glycerol dehydratase                                                              | 0.59  | 3.92E-01 | -1.18 | 2.78E-03 | -1.77 | 3.00E-06 |
| RUMGNA_01188 | diol dehydratase reactivase subunit alpha                                         | 0.54  | 3.97E-01 | -1.66 | 3.96E-06 | -2.2  | 1.57E-10 |
| RUMGNA_01189 | propanediol dehydratase small subunit PduE                                        | 0.6   | 4.56E-01 | -1.46 | 7.89E-04 | -2.06 | 1.16E-06 |
| RUMGNA_01190 | propanediol dehydratase medium subunit PduD                                       | 0.58  | 4.50E-01 | -1.23 | 5.53E-03 | -1.81 | 1.12E-05 |
| RUMGNA_01191 | propanediol dehydratase large subunit PduC                                        | 0.59  | 2.79E-01 | -1.55 | 4.23E-06 | -2.15 | 2.62E-11 |
| RUMGNA_01193 | Hypothetical protein                                                              | 0.03  | 9.74E-01 | 1.7   | 1.83E-08 | 1.67  | 3.16E-08 |
| RUMGNA_01194 | Na <sup>+</sup> /H <sup>+</sup> antiporter family protein                         | 0.28  | 7.54E-01 | 1.82  | 6.84E-06 | 1.54  | 1.05E-04 |
| RUMGNA_01195 | bifunctional hydroxymethylpyrimidine kinase/phosphomethylpyrimidine kinase        | 1.59  | 1.77E-02 | 2.14  | 9.65E-05 | 0.55  | 3.95E-01 |
| RUMGNA_01196 | HAD family phosphatase                                                            | 2.27  | 7.80E-04 | 2.57  | 2.43E-05 | 0.3   | 7.19E-01 |
| RUMGNA_01197 | thiamine phosphate synthase                                                       | 2.05  | 1.19E-04 | 2.24  | 3.80E-06 | 0.2   | 7.83E-01 |
| RUMGNA_01198 | hydroxyethylthiazole kinase                                                       | 1.82  | 1.48E-03 | 1.97  | 1.31E-04 | 0.15  | 8.34E-01 |
| RUMGNA_01199 | Hypothetical protein                                                              | 1.85  | 4.64E-02 | 1.6   | 3.22E-02 | -0.25 | 8.02E-01 |
| RUMGNA_01214 | 1,3-beta-galactosyl-N-acetylhexosamine phosphorylase                              | 0.47  | 4.64E-01 | -1.13 | 1.64E-03 | -1.6  | 1.81E-06 |
| RUMGNA_01278 | 30S ribosomal protein S6                                                          | -0.85 | 1.42E-01 | 1.05  | 1.25E-02 | 1.91  | 3.74E-07 |
| RUMGNA_01279 | ingle-stranded DNA-binding protein                                                | -0.78 | 1.94E-01 | 0.94  | 2.86E-02 | 1.72  | 5.85E-06 |
| RUMGNA_01280 | 30S ribosomal protein S18                                                         | -0.84 | 1.49E-01 | 0.88  | 4.45E-02 | 1.72  | 5.81E-06 |
| RUMGNA_01318 | ABC transporter permease                                                          | 2.05  | 5.84E-05 | 1.91  | 9.69E-05 | -0.14 | 8.39E-01 |
| RUMGNA_01319 | ABC transporter ATP-binding protein                                               | 2.32  | 2.47E-05 | 2.27  | 1.53E-05 | -0.05 | 9.45E-01 |
| RUMGNA_01320 | TetR/AcrR family transcriptional regulator                                        | 2.08  | 1.55E-04 | 2.27  | 1.09E-05 | 0.18  | 7.93E-01 |
| RUMGNA_01329 | Hypothetical protein                                                              | -0.35 | 7.05E-01 | 1.48  | 2.37E-03 | 1.83  | 8.74E-05 |
| RUMGNA_01366 | HPr family phosphocarrier protein                                                 | 0.21  | 7.78E-01 | 1.5   | 2.25E-06 | 1.29  | 3.51E-05 |
| RUMGNA_01367 | Hypothetical protein                                                              | -0.52 | 5.77E-01 | 1.61  | 2.75E-03 | 2.13  | 2.75E-05 |
| RUMGNA_01382 | Hypothetical protein                                                              | 0.1   | 9.42E-01 | -1.63 | 1.01E-03 | -1.74 | 4.46E-04 |
| RUMGNA_01409 | Hypothetical protein                                                              |       |          | 0.81  | 4.27E-01 | 2.05  | 1.41E-02 |
| RUMGNA_01460 | ABC transporter ATP-binding protein                                               | -0.68 | 5.65E-01 | 0.85  | 2.62E-01 | 1.53  | 2.22E-02 |
| RUMGNA_01469 | plantaricin C family lantibiotic                                                  | 0.16  | 8.85E-01 | -1.62 | 7.84E-05 | -1.78 | 8.86E-06 |
| RUMGNA_01490 | signal peptidase I                                                                | 0.78  | 3.39E-01 | -0.95 | 7.31E-02 | -1.73 | 3.10E-04 |
| RUMGNA_01492 | Rrf2 family transcriptional regulator                                             | 0.33  | 7.20E-01 | -1.39 | 1.71E-03 | -1.73 | 3.48E-05 |
| RUMGNA_01493 | LPXTG-motif cell wall anchor domain protein; Cna B-type domain-containing protein | 0.79  | 4.89E-01 | -1.24 | 7.30E-02 | -2.03 | 8.76E-04 |
| RUMGNA_01496 | Hypothetical protein                                                              | 1.13  | 1.97E-01 | -0.49 | 5.05E-01 | -1.61 | 5.46E-03 |
| RUMGNA_01505 | Hypothetical protein                                                              | -0.47 | 6.04E-01 | 1.35  | 5.82E-03 | 1.82  | 5.77E-05 |
| RUMGNA_01506 | aldehyde dehydrogenase (NAD) family protein                                       | -0.4  | 6.29E-01 | 1.22  | 6.08E-03 | 1.62  | 6.77E-05 |

|              |                                                                                                                     |       |          |       |          |       |          |
|--------------|---------------------------------------------------------------------------------------------------------------------|-------|----------|-------|----------|-------|----------|
| RUMGNA_01529 | Hypothetical protein                                                                                                | 0.63  | 2.55E-01 | -1.37 | 5.95E-05 | -2    | 1.03E-09 |
| RUMGNA_01543 | AAA family ATPase                                                                                                   | 0.19  | 7.49E-01 | -1.34 | 1.93E-07 | -1.53 | 1.00E-09 |
| RUMGNA_01568 | Hypothetical protein                                                                                                | 0.09  | 9.54E-01 | 2.17  | 7.22E-05 | 2.08  | 7.90E-05 |
| RUMGNA_01573 | sodium-translocating pyrophosphatase                                                                                | -2.01 | 2.89E-05 | -0.01 | 9.92E-01 | 2.01  | 6.17E-06 |
| RUMGNA_01579 | glucose-1-phosphate adenylyltransferase                                                                             | 1.54  | 3.46E-05 | -1.34 | 1.95E-04 | -2.88 | 7.15E-19 |
| RUMGNA_01580 | glucose-1-phosphate adenylyltransferase subunit GlgD                                                                | 1.4   | 9.53E-03 | -1.09 | 2.84E-02 | -2.48 | 7.10E-09 |
| RUMGNA_01581 | stage V sporulation protein G                                                                                       | 1.39  | 3.32E-02 | -1.11 | 4.88E-02 | -2.5  | 2.73E-07 |
| RUMGNA_01601 | sugar ABC transporter substrate-binding protein                                                                     | 0.59  | 3.16E-01 | -1.79 | 3.76E-07 | -2.38 | 1.94E-12 |
| RUMGNA_01602 | sugar ABC transporter permease                                                                                      | 0.65  | 2.67E-01 | -0.98 | 1.13E-02 | -1.63 | 4.79E-06 |
| RUMGNA_01603 | sugar ABC transporter permease                                                                                      | 0.63  | 2.27E-01 | -1.09 | 1.31E-03 | -1.72 | 7.08E-08 |
| RUMGNA_01611 | Hypothetical protein                                                                                                | 0.67  | 2.80E-01 | -0.94 | 2.60E-02 | -1.62 | 1.94E-05 |
| RUMGNA_01622 | Hypothetical protein                                                                                                | -1.23 | 1.97E-01 | 1.85  | 1.28E-02 | 3.08  | 4.18E-06 |
| RUMGNA_01646 | ketoacyl-ACP synthase III                                                                                           | -0.62 | 5.78E-01 | 2.77  | 1.09E-06 | 3.39  | 5.28E-10 |
| RUMGNA_01647 | acyl carrier protein                                                                                                | -0.95 | 2.49E-01 | 1.9   | 1.15E-03 | 2.86  | 1.21E-07 |
| RUMGNA_01648 | enoyl-[acyl-carrier-protein] reductase FabK                                                                         | 0.26  | 8.69E-01 | 2.53  | 5.39E-05 | 2.27  | 1.88E-04 |
| RUMGNA_01649 | [acyl-carrier-protein] S-malonyltransferase                                                                         | -0.95 | 1.82E-01 | 2.32  | 5.09E-07 | 3.27  | 9.27E-14 |
| RUMGNA_01650 | 3-oxoacyl-[acyl-carrier-protein] reductase                                                                          | -1.08 | 1.61E-01 | 2.77  | 3.24E-08 | 3.86  | 9.39E-16 |
| RUMGNA_01651 | beta-ketoacyl-[acyl-carrier-protein] synthase II                                                                    | -0.57 | 5.16E-01 | 2.65  | 3.63E-09 | 3.21  | 1.63E-13 |
| RUMGNA_01652 | putative acetyl-CoA carboxylase biotin carboxyl carrier protein subunit                                             | -0.75 | 2.66E-01 | 3.05  | 2.19E-14 | 3.79  | 4.51E-22 |
| RUMGNA_01653 | 3-hydroxyacyl-[acyl-carrier-protein] dehydratase FabZ                                                               | -0.76 | 2.27E-01 | 2.88  | 7.34E-14 | 3.64  | 5.75E-22 |
| RUMGNA_01654 | acetyl-CoA carboxylase biotin carboxylase subunit                                                                   | -0.59 | 2.64E-01 | 2.77  | 1.32E-19 | 3.36  | 9.61E-29 |
| RUMGNA_01655 | acetyl-CoA carboxylase carboxyl transferase subunit                                                                 | -0.63 | 2.38E-01 | 2.66  | 3.40E-17 | 3.28  | 3.82E-26 |
| RUMGNA_01656 | nitronate monooxygenase                                                                                             | -0.61 | 2.79E-01 | 2.78  | 2.81E-17 | 3.39  | 1.36E-25 |
| RUMGNA_01657 | MarR family transcriptional regulator                                                                               | -0.58 | 3.35E-01 | 2.17  | 4.44E-10 | 2.75  | 4.22E-16 |
| RUMGNA_01661 | putative transposase                                                                                                | -2.02 | 1.81E-03 | -0.41 | 5.93E-01 | 1.61  | 6.33E-03 |
| RUMGNA_01662 | putative DNA-binding transcriptional regulator CytR or LacI family transcriptional regulator                        | -2.02 | 2.57E-08 | -1.02 | 9.42E-03 | 1     | 6.99E-03 |
| RUMGNA_01664 | Maltose/maltodextrin-binding protein precursor                                                                      | -5.11 | 9.13E-43 | -4.67 | 1.22E-35 | 0.44  | 3.56E-01 |
| RUMGNA_01666 | Maltose transport system permease protein malF                                                                      | -5.36 | 3.97E-45 | -4.93 | 4.16E-38 | 0.43  | 3.81E-01 |
| RUMGNA_01667 | sugar ABC transporter permease or arabinogalactan oligomer / maltooligosaccharide transport system permease protein | -5.35 | 9.76E-49 | -5.02 | 1.19E-42 | 0.34  | 4.84E-01 |
| RUMGNA_01668 | type I pullulanase                                                                                                  | -5.35 | 9.76E-49 | -5.18 | 1.74E-45 | 0.17  | 7.53E-01 |
| RUMGNA_01669 | glycogen debranching protein or amylo-alpha-1,6-glucosidase                                                         | -4.83 | 1.65E-51 | -4.26 | 4.90E-40 | 0.57  | 1.43E-01 |
| RUMGNA_01670 | maltose phosphorylase                                                                                               | -4.15 | 2.95E-37 | -3.25 | 9.16E-23 | 0.9   | 1.50E-02 |
| RUMGNA_01671 | 4-alpha-glucanotransferase                                                                                          | -4.4  | 5.40E-35 | -3.96 | 3.29E-28 | 0.44  | 3.29E-01 |
| RUMGNA_01672 | alpha-glycosidase                                                                                                   | -4.55 | 8.23E-40 | -3.86 | 1.60E-28 | 0.69  | 9.13E-02 |
| RUMGNA_01673 | glucohydrolase or glucan 1,6-alpha-glucosidase                                                                      | -4.59 | 9.84E-67 | -3.84 | 2.25E-46 | 0.75  | 1.38E-02 |



|              |                                                                                  |       |          |       |          |       |          |
|--------------|----------------------------------------------------------------------------------|-------|----------|-------|----------|-------|----------|
| RUMGNA_01679 | MBL fold metallo-hydrolase                                                       | 0.38  | 7.05E-01 | -3.02 | 1.88E-11 | -3.4  | 1.37E-14 |
| RUMGNA_01680 | Hypothetical protein                                                             | 0.18  | 9.28E-01 | -1.51 | 3.45E-02 | -1.69 | 1.60E-02 |
| RUMGNA_01682 | RNA polymerase sporulation sigma factor SigG                                     | 0.23  | 8.77E-01 | -2.06 | 2.45E-04 | -2.29 | 3.29E-05 |
| RUMGNA_01690 | AarF/ABC1/UbiB kinase family protein                                             | 0.91  | 2.91E-02 | -1.58 | 8.56E-07 | -2.5  | 2.40E-16 |
| RUMGNA_01692 | AarF/ABC1/UbiB kinase family protein                                             | 1.17  | 7.80E-04 | -1.6  | 3.73E-08 | -2.76 | 7.38E-22 |
| RUMGNA_01693 | Hypothetical protein                                                             | 1.34  | 2.35E-04 | -2.41 | 9.89E-15 | -3.76 | 3.13E-34 |
| RUMGNA_01695 | MoxR family ATPase                                                               | 0.96  | 1.80E-01 | -1.35 | 4.51E-03 | -2.32 | 3.15E-07 |
| RUMGNA_01696 | DUF58 domain-containing protein                                                  | 0.71  | 4.74E-01 | -1.44 | 1.01E-02 | -2.15 | 3.67E-05 |
| RUMGNA_01697 | transglutaminase domain-containing protein                                       | 0.83  | 1.94E-01 | -1.58 | 1.82E-04 | -2.41 | 9.63E-10 |
| RUMGNA_01698 | Hypothetical protein                                                             | 0.58  | 6.43E-01 | -1.11 | 7.86E-02 | -1.69 | 5.78E-03 |
| RUMGNA_01772 | Glutamate-aspartate carrier protein or dicarboxylate/amino acid:cation symporter | 1.98  | 1.19E-04 | 2.79  | 1.78E-09 | 0.81  | 1.33E-01 |
| RUMGNA_01773 | O-acetylhomoserine aminocarboxypropyltransferase/cysteine synthase               | 2.06  | 8.46E-07 | 2.44  | 6.00E-10 | 0.37  | 4.52E-01 |
| RUMGNA_01774 | pyridoxal 5'-phosphate synthase glutaminase subunit PdxT                         | 1.87  | 1.58E-04 | 2     | 1.26E-05 | 0.13  | 8.42E-01 |
| RUMGNA_01775 | pyridoxal 5'-phosphate synthase lyase subunit PdxS                               | 1.9   | 6.51E-03 | 1.76  | 4.99E-03 | -0.14 | 8.68E-01 |
| RUMGNA_01777 | ATP synthase F1 subunit epsilon                                                  | -1.59 | 1.86E-02 | -0.93 | 1.41E-01 | 0.66  | 2.88E-01 |
| RUMGNA_01778 | F0F1 ATP synthase subunit beta                                                   | -1.56 | 1.84E-02 | -0.96 | 1.18E-01 | 0.61  | 3.27E-01 |
| RUMGNA_01779 | ATP synthase F1 subunit gamma                                                    | -1.54 | 1.76E-02 | -0.95 | 1.14E-01 | 0.59  | 3.28E-01 |
| RUMGNA_01780 | F0F1 ATP synthase subunit alpha                                                  | -1.64 | 7.26E-03 | -1.1  | 5.92E-02 | 0.55  | 3.64E-01 |
| RUMGNA_01781 | ATP synthase F1 subunit delta                                                    | -1.81 | 2.71E-03 | -1.14 | 5.51E-02 | 0.67  | 2.67E-01 |
| RUMGNA_01782 | ATP synthase F0, B subunit                                                       | -1.97 | 1.29E-03 | -1.2  | 5.00E-02 | 0.77  | 2.08E-01 |
| RUMGNA_01783 | ATP synthase F0 subunit C                                                        | -2.23 | 3.09E-04 | -1.14 | 7.55E-02 | 1.09  | 7.01E-02 |
| RUMGNA_01784 | F0F1 ATP synthase subunit A                                                      | -2.14 | 3.26E-04 | -1.27 | 3.81E-02 | 0.88  | 1.44E-01 |
| RUMGNA_01785 | Hypothetical protein                                                             | -1.72 | 3.34E-03 | -1.1  | 5.49E-02 | 0.62  | 2.88E-01 |
| RUMGNA_01786 | Hypothetical protein                                                             |       |          | 1.31  | 1.59E-01 | 1.78  | 3.79E-02 |
| RUMGNA_01789 | Hypothetical protein                                                             | 0.34  | 7.72E-01 | 1.63  | 2.87E-03 | 1.29  | 1.79E-02 |
| RUMGNA_01798 | glucose-1-phosphate adenylyltransferase                                          | 1.92  | 1.26E-06 | -0.94 | 2.68E-02 | -2.87 | 2.58E-15 |
| RUMGNA_01799 | glucose-1-phosphate adenylyltransferase subunit GlgD                             | 1.72  | 5.33E-06 | -0.97 | 1.40E-02 | -2.68 | 2.60E-15 |
| RUMGNA_01807 | GH2 glycoside hydrolase                                                          | 0.55  | 6.24E-01 | 1.54  | 1.06E-02 | 0.99  | 1.13E-01 |
| RUMGNA_01811 | GH13 glycoside hydrolase/1,4-alpha-glucan branching protein GlgB                 | 1.11  | 2.20E-03 | -0.53 | 1.51E-01 | -1.64 | 1.00E-07 |
| RUMGNA_01878 | Hypothetical protein                                                             | 0.58  | 4.20E-01 | 1.89  | 2.59E-06 | 1.31  | 1.26E-03 |
| RUMGNA_01883 | Hypothetical protein                                                             | -0.61 | 4.05E-01 | 1.9   | 1.75E-05 | 2.51  | 3.01E-09 |
| RUMGNA_01912 | cytidylate kinase-like family protein                                            | 0.42  | 4.98E-01 | -1.95 | 4.44E-10 | -2.36 | 8.67E-15 |
| RUMGNA_01925 | ribosome silencing factor                                                        | -0.71 | 2.55E-01 | 0.81  | 6.67E-02 | 1.52  | 7.82E-05 |
| RUMGNA_01926 | HD domain-containing protein                                                     | -0.83 | 1.97E-01 | 1.05  | 2.30E-02 | 1.88  | 4.40E-06 |
| RUMGNA_01927 | nicotinate-nucleotide adenylyltransferase                                        | -0.63 | 3.99E-01 | 1.14  | 1.40E-02 | 1.77  | 2.18E-05 |
| RUMGNA_01928 | ribosome assembly RNA-binding protein YhbY                                       | -0.53 | 5.42E-01 | 1.31  | 6.40E-03 | 1.84  | 2.78E-05 |

|              |                                                                  |       |          |       |          |       |          |
|--------------|------------------------------------------------------------------|-------|----------|-------|----------|-------|----------|
| RUMGNA_01930 | Obg family GTPase CgtA                                           | -0.63 | 3.93E-01 | 1.22  | 7.02E-03 | 1.85  | 6.56E-06 |
| RUMGNA_01933 | 50S ribosomal protein L21                                        | -0.81 | 1.59E-01 | 0.78  | 6.65E-02 | 1.59  | 1.73E-05 |
| RUMGNA_01956 | DegV family protein                                              | -0.24 | 8.08E-01 | 2.51  | 1.41E-09 | 2.75  | 1.48E-11 |
| RUMGNA_01978 | ferredoxin                                                       | -0.23 | 8.12E-01 | -1.51 | 3.53E-04 | -1.28 | 1.92E-03 |
| RUMGNA_01998 | PTS system, glucose-like IIB component                           | 0.33  | 8.72E-01 | -1.75 | 4.77E-02 | -2.07 | 9.94E-03 |
| RUMGNA_02005 | Hypothetical protein                                             | -0.78 | 6.12E-01 | 1.02  | 2.82E-01 | 1.81  | 2.82E-02 |
| RUMGNA_02029 | RNA polymerase sporulation sigma factor SigK                     | -1.35 | 4.22E-02 | 0.92  | 1.34E-01 | 2.27  | 1.31E-05 |
| RUMGNA_02030 | ATP-binding protein                                              | -0.35 | 8.00E-01 | 1.82  | 9.88E-03 | 2.17  | 1.08E-03 |
| RUMGNA_02038 | Hypothetical protein                                             | 0.35  | 8.05E-01 | -1.87 | 1.30E-03 | -2.22 | 1.83E-04 |
| RUMGNA_02082 | diversity-generating retroelement protein Avd                    | -0.75 | 6.49E-01 | -2.26 | 5.03E-03 | -1.51 | 6.37E-02 |
| RUMGNA_02126 | 30S ribosomal protein S2                                         | -0.65 | 3.92E-01 | 1     | 3.83E-02 | 1.65  | 1.02E-04 |
| RUMGNA_02136 | Hypothetical protein                                             | 0.63  | 5.37E-01 | 1.51  | 7.69E-03 | 0.88  | 1.21E-01 |
| RUMGNA_02137 | Hypothetical protein                                             | 0.61  | 5.22E-01 | 1.51  | 5.03E-03 | 0.9   | 9.68E-02 |
| RUMGNA_02152 | PTS beta-glucoside transporter subunit IIBCA                     | 1.11  | 1.79E-01 | -1.66 | 5.42E-04 | -2.77 | 5.57E-08 |
| RUMGNA_02153 | PTS beta-glucoside transporter subunit IIBCA                     | 1.01  | 7.30E-02 | -1.07 | 8.58E-03 | -2.09 | 8.01E-08 |
| RUMGNA_02158 | knotted carbamoyltransferase YgeW                                | 1.27  | 1.56E-03 | -2.67 | 1.84E-16 | -3.93 | 8.46E-34 |
| RUMGNA_02159 | putative selenium metabolism hydrolase                           | 1.22  | 1.20E-03 | -2.62 | 1.02E-17 | -3.84 | 7.08E-36 |
| RUMGNA_02160 | PLP-dependent lyase/thiolase or diaminopropionate ammonia-lyase  | 1.32  | 2.44E-03 | -2.75 | 1.38E-15 | -4.07 | 1.32E-31 |
| RUMGNA_02161 | YheO-like protein                                                | 1.4   | 1.13E-03 | -2.72 | 7.70E-16 | -4.13 | 4.73E-32 |
| RUMGNA_02162 | putative chlorohydrolase/aminohydrolase                          | 1.87  | 1.34E-05 | -1.92 | 3.08E-07 | -3.79 | 4.69E-24 |
| RUMGNA_02163 | putative selenate reductase subunit YgfK                         | 1.51  | 1.41E-02 | -1.94 | 1.30E-04 | -3.45 | 2.07E-13 |
| RUMGNA_02165 | molybdenum hydroxylase                                           | 1.68  | 4.03E-02 | -0.48 | 5.39E-01 | -2.16 | 4.97E-04 |
| RUMGNA_02166 | selenium-dependent xanthine dehydrogenase                        | 1.18  | 3.07E-03 | -1.04 | 4.66E-03 | -2.22 | 1.34E-11 |
| RUMGNA_02167 | molybdate ABC transporter substrate-binding protein              | -0.49 | 6.72E-01 | -2.63 | 1.12E-06 | -2.15 | 6.27E-05 |
| RUMGNA_02168 | molybdenum ABC transporter permease subunit                      | -0.56 | 6.46E-01 | -1.93 | 2.01E-03 | -1.36 | 2.66E-02 |
| RUMGNA_02169 | ABC transporter or Fe(3+) ions import ATP-binding protein FbpC 2 | -0.74 | 4.78E-01 | -1.86 | 1.55E-03 | -1.13 | 5.68E-02 |
| RUMGNA_02170 | molybdenum transporter                                           | -0.71 | 5.15E-01 | -1.69 | 6.40E-03 | -0.97 | 1.21E-01 |
| RUMGNA_02229 | phage tail family protein                                        | 1.27  | 3.18E-01 | -0.52 | 5.84E-01 | -1.79 | 2.68E-02 |
| RUMGNA_02238 | ECF transporter S component                                      | 1.35  | 7.27E-03 | 3.25  | 3.43E-16 | 1.89  | 5.39E-06 |
| RUMGNA_02239 | DEAD/DEAH box helicase                                           | -1.22 | 3.43E-02 | 1.48  | 1.64E-03 | 2.69  | 1.77E-10 |
| RUMGNA_02244 | DNA-binding response regulator                                   | 0.53  | 2.65E-01 | -1.03 | 4.99E-04 | -1.56 | 4.55E-08 |
| RUMGNA_02247 | Hypothetical protein                                             | -0.55 | 6.12E-01 | 1.04  | 8.29E-02 | 1.59  | 3.26E-03 |
| RUMGNA_02251 | Hypothetical protein                                             | -0.73 | 4.30E-01 | 2.42  | 3.27E-06 | 3.15  | 1.79E-10 |
| RUMGNA_02274 | class B sortase                                                  | -0.44 | 7.17E-01 | -1.82 | 1.04E-03 | -1.38 | 1.41E-02 |
| RUMGNA_02277 | isopeptide-forming domain-containing fimbrial protein            | -0.86 | 2.85E-01 | -1.83 | 3.24E-04 | -0.97 | 6.65E-02 |
| RUMGNA_02278 | LPXTG-motif cell wall anchor domain protein                      | -0.71 | 3.98E-01 | -1.87 | 8.05E-05 | -1.16 | 1.62E-02 |
| RUMGNA_02309 | Hypothetical protein                                             | 0.29  | 7.05E-01 | 1.73  | 1.90E-06 | 1.44  | 1.05E-04 |
| RUMGNA_02324 | phage major capsid protein                                       | 1.61  | 1.79E-03 | 0.86  | 8.45E-02 | -0.75 | 1.38E-01 |

|              |                                                      |       |          |       |          |       |          |
|--------------|------------------------------------------------------|-------|----------|-------|----------|-------|----------|
| RUMGNA_02325 | Clp protease ClpP                                    | 2.05  | 5.53E-03 | 1.68  | 1.12E-02 | -0.38 | 6.47E-01 |
| RUMGNA_02339 | Hypothetical protein                                 |       |          | -0.27 | 7.61E-01 | -1.58 | 3.67E-02 |
| RUMGNA_02387 | putative argininosuccinate synthase                  | -0.17 | 9.42E-01 | 1.53  | 9.69E-02 | 1.7   | 4.65E-02 |
| RUMGNA_02388 | argininosuccinate synthase                           | 0.02  | 9.95E-01 | 1.72  | 5.10E-02 | 1.69  | 3.91E-02 |
| RUMGNA_02389 | uracil permease                                      | -0.44 | 4.97E-01 | 1.83  | 6.81E-08 | 2.28  | 3.66E-12 |
| RUMGNA_02426 | antirestriction protein ArdA                         | 0.58  | 6.12E-01 | -1.25 | 2.86E-02 | -1.83 | 9.93E-04 |
| RUMGNA_02450 | TetR family transcriptional regulator                | 0.41  | 4.66E-01 | -1.12 | 2.45E-04 | -1.52 | 1.33E-07 |
| RUMGNA_02458 | Crp/Fnr family transcriptional regulator             | 0.35  | 5.81E-01 | -1.33 | 2.96E-05 | -1.69 | 5.49E-08 |
| RUMGNA_02462 | Putative nucleoside hydrolase                        | -0.57 | 2.49E-01 | 1.21  | 1.49E-04 | 1.78  | 2.01E-09 |
| RUMGNA_02463 | Inosine-uridine preferring nucleoside hydrolase      | -0.49 | 3.56E-01 | 1.17  | 3.14E-04 | 1.66  | 3.41E-08 |
| RUMGNA_02465 | radical SAM protein                                  | -0.79 | 1.27E-01 | 0.93  | 1.55E-02 | 1.72  | 3.93E-07 |
| RUMGNA_02491 | cytidylate kinase-like family protein                | 0.75  | 1.51E-01 | -2.52 | 3.83E-15 | -3.27 | 5.05E-25 |
| RUMGNA_02507 | helix-turn-helix domain-containing protein           | 0.42  | 4.32E-01 | -1.28 | 1.36E-05 | -1.71 | 2.09E-09 |
| RUMGNA_02517 | Hypothetical protein                                 | 1.15  | 3.90E-01 | -0.94 | 2.58E-01 | -2.09 | 6.49E-03 |
| RUMGNA_02518 | DUF1697 domain-containing protein                    | 0.47  | 4.97E-01 | -1.26 | 6.05E-04 | -1.73 | 1.17E-06 |
| RUMGNA_02536 | Hypothetical protein                                 | 0.62  | 3.27E-01 | -1.27 | 1.33E-03 | -1.89 | 2.57E-07 |
| RUMGNA_02537 | L-ribulose-5-phosphate 3-epimerase                   | 0.58  | 2.95E-01 | -1.41 | 4.77E-05 | -1.99 | 1.10E-09 |
| RUMGNA_02538 | DeoR/GlpR transcriptional regulator                  | 0.72  | 1.97E-01 | -1.6  | 1.20E-05 | -2.32 | 1.72E-11 |
| RUMGNA_02539 | PTS lactose transporter subunit IIB                  | 0.74  | 1.80E-01 | -1.91 | 3.67E-08 | -2.65 | 3.67E-15 |
| RUMGNA_02548 | deoxyribose-phosphate aldolase                       | -1.44 | 3.47E-02 | -1.52 | 7.13E-03 | -0.08 | 9.15E-01 |
| RUMGNA_02556 | phosphoribosylformylglycinamide cyclo-ligase         | 0.84  | 4.74E-01 | -0.76 | 3.31E-01 | -1.6  | 1.41E-02 |
| RUMGNA_02566 | sugar phosphate isomerase/epimerase                  |       |          | 1.65  | 7.04E-02 | 1.9   | 2.65E-02 |
| RUMGNA_02567 | LysR family transcriptional regulator                | -0.68 | 3.09E-01 | 2.14  | 2.97E-07 | 2.82  | 2.22E-12 |
| RUMGNA_02575 | PTS system, beta-glucoside-specific, IIABC component | 0.36  | 6.46E-01 | -1.22 | 1.84E-03 | -1.58 | 2.00E-05 |
| RUMGNA_02593 | Hypothetical protein                                 | 0.74  | 1.22E-01 | -1.95 | 3.20E-10 | -2.68 | 2.46E-19 |
| RUMGNA_02608 | Hypothetical protein                                 | -0.02 | 9.92E-01 | 2.7   | 1.12E-09 | 2.72  | 5.42E-10 |
| RUMGNA_02620 | Hypothetical protein                                 | -2.39 | 1.47E-04 | -0.67 | 3.57E-01 | 1.72  | 3.77E-03 |
| RUMGNA_02650 | aminoglycoside phosphotransferase                    | -0.53 | 5.04E-01 | -2.64 | 4.86E-11 | -2.11 | 1.91E-07 |
| RUMGNA_02653 | 50S ribosomal protein L17                            | -1.01 | 3.53E-02 | 0.65  | 1.26E-01 | 1.67  | 4.05E-06 |
| RUMGNA_02654 | DNA-directed RNA polymerase subunit alpha            | -0.96 | 6.68E-02 | 0.62  | 1.62E-01 | 1.58  | 2.15E-05 |
| RUMGNA_02655 | 30S ribosomal protein S4                             | -0.97 | 7.57E-02 | 0.64  | 1.59E-01 | 1.61  | 2.55E-05 |
| RUMGNA_02656 | 30S ribosomal protein S11                            | -0.86 | 1.67E-01 | 0.78  | 9.27E-02 | 1.64  | 4.25E-05 |
| RUMGNA_02657 | 30S ribosomal protein S13                            | -0.92 | 1.23E-01 | 0.75  | 1.02E-01 | 1.67  | 2.24E-05 |
| RUMGNA_02658 | 50S ribosomal protein L36                            | -0.71 | 2.79E-01 | 0.86  | 5.98E-02 | 1.57  | 8.51E-05 |
| RUMGNA_02659 | translation initiation factor IF-1                   | -0.73 | 3.99E-01 | 1.17  | 3.12E-02 | 1.9   | 8.06E-05 |
| RUMGNA_02660 | RNA-binding protein                                  | -0.89 | 2.56E-01 | 1.02  | 6.50E-02 | 1.91  | 7.76E-05 |
| RUMGNA_02661 | adenylate kinase                                     | -0.56 | 4.05E-01 | 1.19  | 3.17E-03 | 1.75  | 2.19E-06 |
| RUMGNA_02662 | preprotein translocase subunit SecY                  | -0.9  | 1.78E-01 | 1     | 3.92E-02 | 1.9   | 7.50E-06 |
| RUMGNA_02663 | 50S ribosomal protein L15                            | -0.91 | 1.81E-01 | 0.96  | 5.46E-02 | 1.87  | 1.74E-05 |
| RUMGNA_02664 | 50S ribosomal protein L30                            | -0.83 | 2.97E-01 | 1.06  | 5.63E-02 | 1.89  | 9.28E-05 |

|              |                                                                                           |       |           |       |           |       |          |
|--------------|-------------------------------------------------------------------------------------------|-------|-----------|-------|-----------|-------|----------|
| RUMGNA_02665 | 30S ribosomal protein S5                                                                  | -0.99 | 1.78E-01  | 0.92  | 9.05E-02  | 1.92  | 4.81E-05 |
| RUMGNA_02666 | 50S ribosomal protein L18                                                                 | -1.05 | 1.67E-01  | 0.98  | 8.10E-02  | 2.03  | 3.26E-05 |
| RUMGNA_02667 | 50S ribosomal protein L6                                                                  | -1.1  | 1.21E-01  | 0.98  | 6.92E-02  | 2.09  | 8.96E-06 |
| RUMGNA_02668 | 30S ribosomal protein S8                                                                  | -1.06 | 1.35E-01  | 0.95  | 7.50E-02  | 2.02  | 1.45E-05 |
| RUMGNA_02669 | type Z 30S ribosomal protein S14                                                          | -0.96 | 2.09E-01  | 1.02  | 6.63E-02  | 1.98  | 4.38E-05 |
| RUMGNA_02670 | 50S ribosomal protein L5                                                                  | -1.09 | 1.27E-01  | 0.97  | 7.34E-02  | 2.06  | 1.20E-05 |
| RUMGNA_02671 | 50S ribosomal protein L24                                                                 | -0.97 | 1.80E-01  | 1     | 5.89E-02  | 1.98  | 1.94E-05 |
| RUMGNA_02672 | 50S ribosomal protein L14                                                                 | -1.15 | 9.33E-02  | 0.87  | 1.14E-01  | 2.02  | 1.73E-05 |
| RUMGNA_02673 | 30S ribosomal protein S17                                                                 | -1.09 | 1.50E-01  | 1.03  | 6.89E-02  | 2.12  | 1.63E-05 |
| RUMGNA_02674 | 50S ribosomal protein L29                                                                 | -0.89 | 3.04E-01  | 1.14  | 5.48E-02  | 2.03  | 9.28E-05 |
| RUMGNA_02675 | 50S ribosomal protein L16                                                                 | -0.95 | 1.94E-01  | 1.04  | 5.21E-02  | 1.99  | 1.94E-05 |
| RUMGNA_02676 | 30S ribosomal protein S3                                                                  | -1.14 | 8.31E-02  | 0.96  | 6.77E-02  | 2.1   | 3.96E-06 |
| RUMGNA_02677 | 50S ribosomal protein L22                                                                 | -1.08 | 1.19E-01  | 1.03  | 5.01E-02  | 2.11  | 4.00E-06 |
| RUMGNA_02678 | 30S ribosomal protein S19                                                                 | -1.13 | 1.00E-01  | 0.87  | 1.09E-01  | 2     | 1.74E-05 |
| RUMGNA_02679 | 50S ribosomal protein L2                                                                  | -1.07 | 1.15E-01  | 0.88  | 9.60E-02  | 1.95  | 1.73E-05 |
| RUMGNA_02680 | 50S ribosomal protein L23                                                                 | -1.06 | 1.36E-01  | 0.91  | 9.01E-02  | 1.97  | 2.16E-05 |
| RUMGNA_02681 | 50S ribosomal protein L4                                                                  | -1.03 | 1.36E-01  | 0.95  | 6.63E-02  | 1.98  | 1.11E-05 |
| RUMGNA_02682 | 50S ribosomal protein L3                                                                  | -0.94 | 1.82E-01  | 1.1   | 3.21E-02  | 2.03  | 6.00E-06 |
| RUMGNA_02683 | 30S ribosomal protein S10                                                                 | -0.97 | 1.53E-01  | 1.18  | 1.62E-02  | 2.16  | 8.24E-07 |
| RUMGNA_02690 | MerR family transcriptional regulator                                                     | 0.87  | 9.86E-02  | -0.74 | 7.08E-02  | -1.61 | 7.28E-06 |
| RUMGNA_02691 | NanK                                                                                      | 0.55  | 6.16E-01  | -1.42 | 1.49E-02  | -1.97 | 2.35E-04 |
| RUMGNA_02692 | NanA                                                                                      | 1.14  | 1.78E-01  | -1.66 | 4.85E-03  | -2.8  | 1.50E-07 |
| RUMGNA_02693 | NanE                                                                                      | 0.97  | 2.11E-01  | -1.71 | 1.12E-03  | -2.68 | 2.80E-08 |
| RUMGNA_02694 | RgNanH                                                                                    | 0.9   | 2.41E-01  | -1.82 | 2.91E-04  | -2.72 | 4.79E-09 |
| RUMGNA_02695 | Hypothetical protein                                                                      | 0.89  | 3.14E-01  | -1.93 | 5.17E-04  | -2.82 | 4.50E-08 |
| RUMGNA_02696 | ABC transporter permease                                                                  | 1.02  | 2.24E-01  | -1.8  | 1.27E-03  | -2.82 | 3.86E-08 |
| RUMGNA_02697 | ABC transporter permease                                                                  | 1.02  | 1.45E-01  | -1.53 | 1.79E-03  | -2.54 | 1.14E-08 |
| RUMGNA_02698 | ABC transporter solute-binding protein                                                    | 1.26  | 2.80E-02  | -1.44 | 2.23E-03  | -2.7  | 2.04E-10 |
| RUMGNA_02704 | PTS beta-glucoside transporter subunit EIIBCA                                             | 0.41  | 6.90E-01  | -1.41 | 3.47E-03  | -1.82 | 9.54E-05 |
| RUMGNA_02726 | pyrroline-5-carboxylate reductase                                                         | -0.72 | 2.70E-01  | -1.65 | 7.08E-05  | -0.93 | 2.92E-02 |
| RUMGNA_02727 | anaerobic ribonucleoside-triphosphate reductase activating protein                        | -1.04 | 1.63E-01  | -1.55 | 2.73E-03  | -0.51 | 3.68E-01 |
| RUMGNA_02728 | ABC transporter substrate-binding protein or Maltose-binding periplasmic proteins/domains | -9.04 | 3.75E-123 | -8.75 | 2.60E-115 | 0.29  | 5.94E-01 |
| RUMGNA_02729 | ABC transporter permease                                                                  | -9    | 9.14E-104 | -8.25 | 7.32E-87  | 0.76  | 1.30E-01 |
| RUMGNA_02730 | sugar ABC transporter permease                                                            | -8.7  | 2.11E-84  | -8.16 | 5.15E-74  | 0.54  | 3.43E-01 |
| RUMGNA_02731 | DNA-binding response regulator                                                            | -5.04 | 1.92E-65  | -3.55 | 2.57E-32  | 1.49  | 2.54E-06 |
| RUMGNA_02732 | two-component sensor histidine kinase                                                     | -4.74 | 2.78E-70  | -3.3  | 5.36E-34  | 1.44  | 5.62E-07 |
| RUMGNA_02733 | sugar ABC transporter substrate-binding protein                                           | -4.24 | 3.55E-48  | -3.02 | 2.44E-24  | 1.22  | 1.19E-04 |
| RUMGNA_02734 | ribonucleoside triphosphate reductase                                                     | -1.86 | 1.35E-09  | -1.15 | 3.57E-04  | 0.7   | 3.05E-02 |

|              |                                      |       |          |       |          |       |          |
|--------------|--------------------------------------|-------|----------|-------|----------|-------|----------|
| RUMGNA_02757 | Hypothetical protein                 | 0.2   | 9.22E-01 | -3.71 | 8.38E-10 | -3.91 | 1.29E-09 |
| RUMGNA_02758 | V-type ATP synthase subunit I        | 0.51  | 7.79E-01 | -2.37 | 5.32E-03 | -2.88 | 2.30E-04 |
| RUMGNA_02759 | V-type ATP synthase subunit K        | 0.99  | 5.54E-01 | -1.61 | 9.90E-02 | -2.6  | 2.56E-03 |
| RUMGNA_02760 | Hypothetical protein                 | 0.92  | 5.84E-01 | -1.56 | 1.10E-01 | -2.48 | 4.00E-03 |
| RUMGNA_02761 | V-type ATP synthase subunit C        | 0.97  | 5.69E-01 | -1.27 | 2.18E-01 | -2.25 | 1.18E-02 |
| RUMGNA_02762 | V-type ATP synthase subunit F        | 0.89  | 6.16E-01 | -1.4  | 1.71E-01 | -2.29 | 1.10E-02 |
| RUMGNA_02763 | V-type ATP synthase subunit A        | 1.09  | 5.04E-01 | -1.24 | 2.31E-01 | -2.34 | 8.58E-03 |
| RUMGNA_02765 | V-type ATP synthase subunit D        | 0.76  | 6.89E-01 | -1.29 | 2.14E-01 | -2.05 | 2.41E-02 |
| RUMGNA_02766 | Hypothetical protein                 | 0.66  | 6.12E-01 | -0.98 | 1.85E-01 | -1.64 | 1.35E-02 |
| RUMGNA_02774 | gfo/Idh/MocA family oxidoreductase   | 0.24  | 7.30E-01 | -1.37 | 5.73E-06 | -1.61 | 1.15E-07 |
| RUMGNA_02792 | transcription elongation factor GreA | -0.74 | 2.37E-01 | 0.83  | 6.45E-02 | 1.57  | 5.77E-05 |
| RUMGNA_02803 | glycerol dehydrogenase               | -0.36 | 8.57E-01 | 1.33  | 1.53E-01 | 1.68  | 4.90E-02 |
| RUMGNA_02854 | Hypothetical protein                 | 0.1   | 9.40E-01 | -1.98 | 3.41E-06 | -2.08 | 3.80E-06 |
| RUMGNA_02859 | Hypothetical protein                 | -0.62 | 3.98E-01 | 1.38  | 2.59E-03 | 2     | 2.47E-06 |
| RUMGNA_02867 | DUF177 domain-containing protein     | -0.54 | 3.91E-01 | 0.97  | 1.34E-02 | 1.51  | 1.74E-05 |
| RUMGNA_02877 | Hypothetical protein                 | 2.14  | 3.46E-05 | -1.12 | 3.63E-02 | -3.26 | 1.32E-12 |
| RUMGNA_02878 | V-type ATP synthase subunit C        | 2.08  | 4.57E-05 | -1.01 | 5.98E-02 | -3.09 | 9.46E-12 |
| RUMGNA_02879 | ATPase                               | 1.97  | 1.18E-04 | -0.78 | 1.63E-01 | -2.74 | 1.57E-09 |
| RUMGNA_02880 | ATPase                               | 1.83  | 5.75E-04 | -0.85 | 1.21E-01 | -2.68 | 6.29E-09 |
| RUMGNA_02881 | V-type ATP synthase subunit F        | 2.04  | 7.26E-05 | -0.73 | 1.94E-01 | -2.77 | 1.68E-09 |
| RUMGNA_02882 | V-type ATP synthase subunit E        | 2.08  | 2.97E-05 | -0.81 | 1.30E-01 | -2.89 | 8.49E-11 |
| RUMGNA_02883 | V-type ATP synthase subunit A        | 1.77  | 7.55E-04 | -0.82 | 1.36E-01 | -2.58 | 1.19E-08 |
| RUMGNA_02884 | V-type ATP synthase subunit B        | 1.61  | 3.48E-03 | -0.6  | 3.04E-01 | -2.22 | 2.10E-06 |
| RUMGNA_02885 | V-type ATP synthase subunit D        | 1.64  | 1.25E-03 | -0.34 | 5.66E-01 | -1.98 | 7.86E-06 |
| RUMGNA_02897 | Hypothetical protein                 | -0.43 | 6.71E-01 | 2.06  | 3.35E-05 | 2.49  | 1.32E-07 |
| RUMGNA_02926 | Cna B-type domain-containing protein | 0.79  | 3.92E-01 | -1.07 | 7.20E-02 | -1.86 | 3.52E-04 |
| RUMGNA_02928 | HD domain-containing protein         | 1.06  | 1.64E-01 | -0.95 | 9.48E-02 | -2    | 4.65E-05 |
| RUMGNA_02929 | stannin unstructured linker          | 0.79  | 3.32E-01 | -1.08 | 4.87E-02 | -1.86 | 1.05E-04 |
| RUMGNA_02930 | Hypothetical protein                 | 0.38  | 7.05E-01 | -1.16 | 1.98E-02 | -1.54 | 8.22E-04 |
| RUMGNA_02933 | Hypothetical protein                 | 0.72  | 3.91E-01 | -1.18 | 2.48E-02 | -1.91 | 4.80E-05 |
| RUMGNA_02935 | Hypothetical protein                 |       |          | 1.73  | 4.80E-02 | 1.63  | 5.31E-02 |
| RUMGNA_02957 | RNA polymerase subunit sigma-70      | -0.77 | 1.94E-01 | 1.44  | 5.22E-04 | 2.21  | 1.06E-08 |
| RUMGNA_02958 | DUF4179 domain-containing protein    | -0.51 | 4.76E-01 | 1.56  | 7.52E-05 | 2.07  | 2.28E-08 |
| RUMGNA_02959 | DNA polymerase III subunit epsilon   | -0.28 | 5.63E-01 | 1.73  | 2.57E-14 | 2     | 4.73E-19 |
| RUMGNA_02976 | Hypothetical protein                 | -0.13 | 9.23E-01 | 1.54  | 1.11E-03 | 1.67  | 1.67E-04 |
| RUMGNA_02986 | Hypothetical protein                 | -1    | 2.46E-01 | 0.69  | 2.97E-01 | 1.69  | 2.03E-03 |
| RUMGNA_02987 | Hypothetical protein                 | -0.61 | 5.46E-01 | 2.05  | 1.31E-04 | 2.65  | 1.33E-07 |
| RUMGNA_02988 | Hypothetical protein                 | -0.55 | 7.11E-01 | 2.04  | 7.02E-03 | 2.59  | 2.13E-04 |
| RUMGNA_02992 | Hypothetical protein                 | 0.03  | 9.88E-01 | 1.92  | 2.03E-03 | 1.88  | 1.35E-03 |
| RUMGNA_03004 | ECF transporter S component          | 2.96  | 6.15E-06 | 2.05  | 1.49E-03 | -0.9  | 2.01E-01 |

|              |                                                                                           |       |          |       |          |       |          |
|--------------|-------------------------------------------------------------------------------------------|-------|----------|-------|----------|-------|----------|
| RUMGNA_03005 | cobalt transport protein or energy-coupling factor transporter transmembrane protein EcFT | 2.73  | 5.56E-05 | 2.15  | 1.24E-03 | -0.58 | 4.47E-01 |
| RUMGNA_03006 | ABC transporter ATP-binding protein                                                       | 2.56  | 4.27E-05 | 2.24  | 2.10E-04 | -0.32 | 6.69E-01 |
| RUMGNA_03007 | ABC transporter ATP-binding protein                                                       | 2.21  | 8.87E-04 | 1.91  | 2.20E-03 | -0.3  | 7.07E-01 |
| RUMGNA_03013 | ribokinase                                                                                | 2.56  | 2.16E-06 | 2.54  | 9.82E-07 | -0.03 | 9.74E-01 |
| RUMGNA_03014 | ribonucleoside hydrolase RihC                                                             | 1.64  | 9.86E-03 | 1.61  | 4.11E-03 | -0.02 | 9.76E-01 |
| RUMGNA_03016 | Hypothetical protein                                                                      | -0.61 | 4.14E-01 | 1.34  | 5.92E-03 | 1.94  | 1.75E-05 |
| RUMGNA_03020 | ABC transporter permease                                                                  | -0.98 | 1.38E-01 | 1.08  | 4.20E-02 | 2.06  | 1.18E-05 |
| RUMGNA_03022 | MarR family transcriptional regulator                                                     | 0.16  | 8.40E-01 | 2.66  | 5.96E-19 | 2.5   | 1.16E-16 |
| RUMGNA_03023 | ABC transporter ATP-binding protein                                                       | 0.25  | 6.93E-01 | 2.53  | 1.32E-19 | 2.27  | 6.67E-16 |
| RUMGNA_03024 | ABC transporter ATP-binding protein                                                       | 0.17  | 7.60E-01 | 2.36  | 2.61E-25 | 2.19  | 9.20E-22 |
| RUMGNA_03025 | ABC transporter ATP-binding protein                                                       | -0.36 | 5.69E-01 | 1.96  | 1.16E-09 | 2.33  | 2.14E-13 |
| RUMGNA_03026 | ABC transporter permease                                                                  | -0.42 | 4.75E-01 | 1.61  | 3.08E-07 | 2.03  | 2.64E-11 |
| RUMGNA_03030 | Rpn family recombination-promoting nuclease/putative transposase                          | 0.53  | 2.93E-01 | -1.07 | 5.90E-04 | -1.6  | 7.12E-08 |
| RUMGNA_03032 | Hypothetical protein                                                                      | 0.88  | 2.07E-01 | -1.1  | 2.21E-02 | -1.98 | 6.81E-06 |
| RUMGNA_03033 | LacI family transcriptional regulator                                                     | 0.77  | 1.42E-01 | -1.42 | 5.31E-05 | -2.2  | 3.91E-11 |
| RUMGNA_03034 | LacI family DNA-binding transcriptional regulator                                         | 0.87  | 1.76E-02 | -0.85 | 7.65E-03 | -1.73 | 1.04E-09 |
| RUMGNA_03038 | Hypothetical protein                                                                      | -1.84 | 1.97E-07 | -2.43 | 1.92E-13 | -0.58 | 1.27E-01 |
| RUMGNA_03039 | PucR family transcriptional regulator                                                     | -1.95 | 5.35E-09 | -2.56 | 5.09E-16 | -0.61 | 9.35E-02 |
| RUMGNA_03040 | multiple sugar-binding transporter ATP-binding protein                                    | -3.1  | 5.50E-33 | -4.14 | 1.09E-58 | -1.04 | 2.14E-04 |
| RUMGNA_03041 | MerR family transcriptional regulator                                                     | 0.77  | 3.26E-01 | -0.76 | 1.45E-01 | -1.53 | 1.13E-03 |
| RUMGNA_03051 | PRD domain-containing protein                                                             | 2.54  | 1.35E-15 | 2.82  | 1.50E-19 | 0.29  | 4.82E-01 |
| RUMGNA_03052 | PTS glucose transporter subunit IIA                                                       | 2.8   | 1.01E-18 | 2.45  | 1.25E-14 | -0.35 | 3.84E-01 |
| RUMGNA_03053 | PTS glucose transporter subunit IIBC                                                      | 3.38  | 3.02E-23 | 3.36  | 4.85E-23 | -0.02 | 9.76E-01 |
| RUMGNA_03056 | LysR family transcriptional regulator                                                     | -0.7  | 2.81E-01 | 0.91  | 4.95E-02 | 1.61  | 8.43E-05 |
| RUMGNA_03058 | NAD(P)H-dependent oxidoreductase subunit E                                                | 1.68  | 1.18E-04 | -1.3  | 1.39E-03 | -2.99 | 3.65E-15 |
| RUMGNA_03059 | NADH-quinone oxidoreductase subunit NuoF                                                  | 2.25  | 1.70E-05 | -0.29 | 6.59E-01 | -2.54 | 1.12E-07 |
| RUMGNA_03060 | ferredoxin                                                                                | 2.16  | 4.29E-05 | -0.38 | 5.62E-01 | -2.53 | 1.23E-07 |
| RUMGNA_03080 | pyridoxamine kinase                                                                       | 0.9   | 3.21E-01 | 1.58  | 7.82E-03 | 0.68  | 2.90E-01 |
| RUMGNA_03108 | Hypothetical protein                                                                      | 0.64  | 3.32E-01 | -1.38 | 3.29E-04 | -2.02 | 1.15E-07 |
| RUMGNA_03109 | Hypothetical protein                                                                      | 0.59  | 2.84E-01 | -1.09 | 2.61E-03 | -1.68 | 4.09E-07 |
| RUMGNA_03126 | QueT transporter family protein                                                           | -0.93 | 2.09E-02 | 0.86  | 1.48E-02 | 1.79  | 7.08E-09 |
| RUMGNA_03137 | Hypothetical protein                                                                      | 0.25  | 8.75E-01 | -2.2  | 5.68E-04 | -2.45 | 4.68E-05 |
| RUMGNA_03138 | Hypothetical protein                                                                      | 0.12  | 9.48E-01 | -2.52 | 3.98E-05 | -2.63 | 7.62E-06 |
| RUMGNA_03139 | Hypothetical protein                                                                      | -0.22 | 8.13E-01 | 1.44  | 5.86E-04 | 1.66  | 3.55E-05 |
| RUMGNA_03140 | Hypothetical protein                                                                      | 0.71  | 1.55E-01 | -1.78 | 1.80E-08 | -2.49 | 5.91E-16 |
| RUMGNA_03141 | Hypothetical protein                                                                      | 0.43  | 7.66E-01 | -2.17 | 1.76E-04 | -2.6  | 1.98E-05 |
| RUMGNA_03142 | Activase                                                                                  | 1.25  | 1.13E-03 | -2.35 | 1.91E-14 | -3.61 | 9.22E-31 |
| RUMGNA_03143 | 2-hydroxyglutaryl-CoA dehydratase                                                         | 1.28  | 1.26E-03 | -2.48 | 9.89E-15 | -3.76 | 2.27E-31 |

|              |                                                                         |       |          |       |          |       |          |
|--------------|-------------------------------------------------------------------------|-------|----------|-------|----------|-------|----------|
| RUMGNA_03144 | 2-hydroxyglutaryl-CoA dehydratase                                       | 2.05  | 3.13E-04 | -1.72 | 5.69E-04 | -3.77 | 9.58E-15 |
| RUMGNA_03145 | cobyrinic acid a,c-diamide synthase                                     | 1.41  | 1.51E-03 | -1.92 | 1.49E-08 | -3.32 | 3.83E-20 |
| RUMGNA_03146 | enoate reductase                                                        | 1.47  | 1.94E-03 | -2.01 | 4.45E-07 | -3.48 | 3.02E-19 |
| RUMGNA_03148 | dihydropyrimidinase                                                     | 0.46  | 5.12E-01 | -1.26 | 1.05E-03 | -1.72 | 1.57E-06 |
| RUMGNA_03154 | Rpn family recombination-promoting nuclease/putative transposase        | 0.58  | 1.97E-01 | -1.13 | 1.15E-04 | -1.72 | 1.05E-09 |
| RUMGNA_03182 | secretion protein F                                                     |       |          | -0.34 | 7.82E-01 | -1.93 | 4.06E-02 |
| RUMGNA_03186 | Hypothetical protein                                                    | 0.61  | 5.99E-01 | 2.44  | 5.75E-05 | 1.82  | 2.79E-03 |
| RUMGNA_03187 | pro-sigmaK processing inhibitor BofA                                    |       |          | 1.97  | 2.31E-02 | 2.53  | 1.49E-03 |
| RUMGNA_03243 | Hypothetical protein                                                    | 0.24  | 7.67E-01 | -1.43 | 3.79E-05 | -1.66 | 8.61E-07 |
| RUMGNA_03244 | DUF3784 domain-containing protein                                       | 0.26  | 7.08E-01 | -1.57 | 2.72E-07 | -1.82 | 1.95E-09 |
| RUMGNA_03245 | DUF4825 domain-containing protein                                       | 0.18  | 8.44E-01 | -1.37 | 2.45E-04 | -1.55 | 1.79E-05 |
| RUMGNA_03291 | Hypothetical protein                                                    | 1.91  | 1.84E-05 | -1.88 | 1.03E-05 | -3.78 | 2.63E-22 |
| RUMGNA_03296 | elongation factor G                                                     | 2.12  | 6.22E-10 | -2.02 | 2.03E-09 | -4.14 | 2.56E-38 |
| RUMGNA_03305 | copper-translocating P-type ATPase                                      | 0.46  | 5.88E-01 | -2.32 | 2.80E-08 | -2.78 | 6.56E-12 |
| RUMGNA_03306 | copper-translocating P-type ATPase                                      | 0.58  | 4.77E-01 | -2.67 | 2.23E-10 | -3.25 | 2.60E-15 |
| RUMGNA_03307 | carbon starvation protein CstA                                          | 0.53  | 4.89E-01 | -2.46 | 3.52E-10 | -2.98 | 5.02E-15 |
| RUMGNA_03316 | bifunctional precorrin-2 dehydrogenase/sirohydrochlorin ferrochelataase | -0.34 | 7.22E-01 | 1.45  | 2.42E-03 | 1.79  | 6.80E-05 |
| RUMGNA_03317 | precorrin-8X methylmutase                                               | -0.46 | 6.90E-01 | 1.12  | 6.48E-02 | 1.58  | 3.99E-03 |
| RUMGNA_03318 | adenosylcobinamide kinase                                               | -0.19 | 8.50E-01 | 1.46  | 1.30E-03 | 1.65  | 1.52E-04 |
| RUMGNA_03350 | ammonium transporter                                                    | -1.69 | 1.94E-03 | -1.93 | 7.84E-05 | -0.24 | 6.96E-01 |
| RUMGNA_03351 | P-II family nitrogen regulator                                          | -1.06 | 2.33E-01 | -1.83 | 1.57E-03 | -0.77 | 2.14E-01 |
| RUMGNA_03357 | Hypothetical protein                                                    | 0.03  | 9.80E-01 | -1.59 | 3.87E-06 | -1.62 | 1.21E-06 |
| RUMGNA_03374 | Hypothetical protein                                                    | -0.44 | 5.95E-01 | 2.67  | 1.88E-10 | 3.12  | 4.11E-14 |
| RUMGNA_03403 | Hypothetical protein                                                    | -1.08 | 2.60E-01 | 1.88  | 1.18E-02 | 2.96  | 1.31E-05 |
| RUMGNA_03411 | putative fucosidase GH29                                                | 2.79  | 2.66E-07 | 0.56  | 4.11E-01 | -2.24 | 2.02E-05 |
| RUMGNA_03413 | thioether cross-link-forming SCIFF peptide maturase                     | -0.31 | 6.49E-01 | 1.24  | 2.45E-04 | 1.55  | 1.16E-06 |
| RUMGNA_03438 | adenine deaminase                                                       | 1.11  | 4.86E-01 | -0.8  | 4.64E-01 | -1.92 | 3.25E-02 |
| RUMGNA_03439 | adenine deaminase                                                       | 1.43  | 3.08E-01 | -0.66 | 5.56E-01 | -2.08 | 1.82E-02 |
| RUMGNA_03442 | GTPase Era                                                              | -0.12 | 8.99E-01 | -1.5  | 3.96E-06 | -1.39 | 1.39E-05 |
| RUMGNA_03444 | NAD(FAD)-dependent dehydrogenase                                        | 0.38  | 7.98E-01 | -5.77 | 5.27E-37 | -6.15 | 2.94E-29 |
| RUMGNA_03445 | pyridine nucleotide-disulfide oxidoreductase                            | -0.21 | 8.75E-01 | -5.89 | 7.18E-45 | -5.68 | 5.82E-36 |
| RUMGNA_03446 | FAD dependent oxidoreductase                                            | 0.06  | 9.79E-01 | -5.79 | 1.44E-26 | -5.85 | 2.67E-24 |
| RUMGNA_03447 | alpha-glycosidase or neopullulanase                                     | -3.36 | 8.70E-20 | -0.67 | 1.47E-01 | 2.68  | 6.91E-13 |
| RUMGNA_03448 | maltose ABC transporter substrate-binding protein                       | -3.45 | 1.94E-30 | -0.66 | 8.12E-02 | 2.79  | 7.20E-20 |
| RUMGNA_03449 | maltose ABC transporter permease                                        | -3.16 | 6.35E-18 | -0.24 | 6.54E-01 | 2.92  | 2.58E-15 |
| RUMGNA_03450 | Maltose transport system permease protein malF                          | -3.01 | 1.24E-16 | 0.06  | 9.27E-01 | 3.06  | 3.08E-17 |
| RUMGNA_03454 | glycerol-3-phosphate responsive antiterminator                          | 0.28  | 7.83E-01 | -1.31 | 3.57E-03 | -1.59 | 1.92E-04 |
| RUMGNA_03463 | Hypothetical protein                                                    | -0.73 | 2.79E-01 | 0.96  | 5.01E-02 | 1.69  | 1.10E-04 |

|              |                                                            |       |          |       |          |       |          |
|--------------|------------------------------------------------------------|-------|----------|-------|----------|-------|----------|
| RUMGNA_03465 | Hypothetical protein                                       |       |          | 1.35  | 1.20E-01 | 1.93  | 1.42E-02 |
| RUMGNA_03466 | Hypothetical protein                                       | -0.65 | 2.16E-01 | 2.28  | 2.79E-12 | 2.93  | 4.61E-20 |
| RUMGNA_03467 | dipeptide ABC transporter ATP-binding protein              | -0.77 | 1.45E-01 | 1.46  | 4.77E-05 | 2.23  | 2.23E-11 |
| RUMGNA_03468 | ABC transporter ATP-binding protein                        | -0.75 | 1.78E-01 | 1.52  | 3.64E-05 | 2.27  | 3.53E-11 |
| RUMGNA_03469 | ABC transporter permease                                   | -0.74 | 1.97E-01 | 1.61  | 2.45E-05 | 2.35  | 3.96E-11 |
| RUMGNA_03470 | ABC transporter permease                                   | -0.72 | 2.24E-01 | 1.74  | 4.52E-06 | 2.46  | 6.34E-12 |
| RUMGNA_03472 | M3 family oligoendopeptidase                               | -0.91 | 3.65E-02 | 0.69  | 6.50E-02 | 1.6   | 7.31E-07 |
| RUMGNA_03473 | Hypothetical protein                                       | -1.25 | 1.78E-01 | 1.03  | 1.74E-01 | 2.29  | 4.01E-04 |
| RUMGNA_03486 | Abi family protein                                         | -0.03 | 9.84E-01 | 1.48  | 1.33E-05 | 1.51  | 4.74E-06 |
| RUMGNA_03499 | Hypothetical protein                                       | 0.92  | 3.97E-02 | -0.86 | 1.70E-02 | -1.78 | 6.18E-08 |
| RUMGNA_03504 | helix-turn-helix domain-containing protein                 | 0.96  | 4.69E-01 | -0.73 | 3.61E-01 | -1.69 | 2.16E-02 |
| RUMGNA_03511 | glutamine--fructose-6-phosphate transaminase (isomerizing) | -1.55 | 3.41E-05 | -1.06 | 5.16E-03 | 0.49  | 2.12E-01 |
| RUMGNA_03522 | Hypothetical protein                                       | -0.67 | 2.50E-01 | 1     | 1.28E-02 | 1.67  | 3.40E-06 |
| RUMGNA_03523 | Hypothetical protein                                       | -0.57 | 3.05E-01 | 1.28  | 2.89E-04 | 1.86  | 1.52E-08 |
| RUMGNA_03567 | thiamine biosynthesis protein ThiC                         | 1.24  | 7.57E-02 | 2.13  | 2.69E-05 | 0.89  | 1.00E-01 |
| RUMGNA_03573 | trigger factor                                             | -0.49 | 3.87E-01 | 1.09  | 1.28E-03 | 1.58  | 3.75E-07 |
| RUMGNA_03594 | ribosome-associated translation inhibitor RaiA             | 0.63  | 1.97E-01 | -1.75 | 1.50E-08 | -2.38 | 1.09E-15 |
| RUMGNA_03603 | Hypothetical protein                                       | 0.16  | 9.25E-01 | 2.69  | 8.62E-05 | 2.53  | 1.89E-04 |
| RUMGNA_03612 | alpha-galactosidase                                        | -0.24 | 8.69E-01 | -2.02 | 5.41E-04 | -1.78 | 1.92E-03 |
| RUMGNA_03613 | ABC transporter permease                                   | 0.47  | 6.75E-01 | -2.07 | 1.06E-05 | -2.54 | 3.56E-07 |
| RUMGNA_03615 | sugar ABC transporter permease                             | 0.11  | 9.21E-01 | -1.85 | 8.84E-08 | -1.96 | 2.80E-08 |
| RUMGNA_03616 | ABC transporter, solute-binding protein                    | -0.61 | 3.92E-01 | -2.39 | 1.65E-10 | -1.79 | 4.26E-06 |
| RUMGNA_03619 | carbamoyl phosphate synthase small subunit                 | -0.11 | 9.10E-01 | 1.5   | 5.17E-06 | 1.61  | 4.15E-07 |
| RUMGNA_03683 | xanthine dehydrogenase FAD-binding subunit XdhB            | 0.77  | 3.22E-01 | -0.8  | 1.41E-01 | -1.58 | 8.40E-04 |
| RUMGNA_03684 | xanthine dehydrogenase molybdenum-binding subunit XdhA     | 1.18  | 8.85E-02 | -0.48 | 4.39E-01 | -1.66 | 6.30E-04 |
| RUMGNA_03685 | amidohydrolase                                             | 2.07  | 7.95E-08 | 0.29  | 5.66E-01 | -1.79 | 1.81E-06 |
| RUMGNA_03738 | Hypothetical protein                                       | -0.49 | 7.53E-01 | 1.47  | 7.31E-02 | 1.96  | 9.56E-03 |
| RUMGNA_03752 | Transposase and inactivated derivatives                    | 0.46  | 7.15E-01 | -1.58 | 4.14E-03 | -2.04 | 2.80E-04 |
| RUMGNA_03753 | IS66 family transposase                                    | 0.64  | 3.22E-01 | -1.14 | 2.75E-03 | -1.78 | 2.72E-06 |
| RUMGNA_03757 | putative transposase                                       | 1.02  | 2.35E-01 | -0.65 | 2.62E-01 | -1.67 | 2.33E-03 |
| RUMGNA_03762 | Hypothetical protein                                       | 0.64  | 2.97E-01 | -1    | 1.14E-02 | -1.64 | 8.89E-06 |
| RUMGNA_03763 | Hypothetical protein                                       | 0.84  | 1.58E-01 | -0.7  | 9.71E-02 | -1.54 | 6.29E-05 |
| RUMGNA_03765 | Hypothetical protein                                       | 0.75  | 2.27E-01 | -1.71 | 1.15E-05 | -2.45 | 5.50E-11 |
| RUMGNA_03766 | ABC transporter, ATP-binding protein                       | 0.65  | 2.05E-01 | -1.05 | 1.78E-03 | -1.7  | 9.13E-08 |
| RUMGNA_03775 | Hypothetical protein                                       | 0.41  | 5.64E-01 | -1.5  | 3.78E-05 | -1.91 | 3.41E-08 |
| RUMGNA_03777 | Hypothetical protein                                       | 0.63  | 3.38E-01 | -1.2  | 3.74E-03 | -1.83 | 2.00E-06 |
| RUMGNA_03787 | N-acetylmuramoyl-L-alanine amidase                         | -0.94 | 1.60E-01 | 1     | 5.51E-02 | 1.94  | 2.60E-05 |
| RUMGNA_03804 | quinolinate synthase NadA                                  | -0.88 | 1.78E-01 | 0.71  | 1.53E-01 | 1.59  | 1.86E-04 |



|              |                                                                  |       |          |       |          |       |          |
|--------------|------------------------------------------------------------------|-------|----------|-------|----------|-------|----------|
| RUMGNA_03811 | orotate phosphoribosyltransferase                                | 0.31  | 7.05E-01 | -2.67 | 1.23E-13 | -2.99 | 7.66E-17 |
| RUMGNA_03815 | DNA topoisomerase 4 subunit B                                    | -0.9  | 1.36E-01 | 0.86  | 5.84E-02 | 1.77  | 8.26E-06 |
| RUMGNA_03816 | DNA topoisomerase 4 subunit A                                    | -0.9  | 4.90E-02 | 0.99  | 7.57E-03 | 1.89  | 9.50E-09 |
| RUMGNA_03833 | putative fucosidase GH29                                         | -0.6  | 2.94E-01 | 0.91  | 1.96E-02 | 1.51  | 1.80E-05 |
| RUMGNA_03845 | Hypothetical protein                                             | 0.11  | 9.39E-01 | 2.1   | 5.48E-05 | 1.98  | 7.95E-05 |
| RUMGNA_03849 | guanylate kinase                                                 | -0.59 | 4.30E-01 | 1.08  | 1.78E-02 | 1.67  | 4.57E-05 |
| RUMGNA_03850 | multidrug efflux pump VmrA                                       | -0.9  | 4.84E-01 | 1.65  | 4.65E-02 | 2.54  | 5.77E-04 |
| RUMGNA_03851 | sugar ABC transporter permease                                   |       |          | 2.06  | 2.08E-02 | 2.97  | 2.33E-04 |
| RUMGNA_03852 | sugar ABC transporter permease                                   | -1.2  | 1.42E-01 | 1.93  | 4.15E-03 | 3.13  | 3.22E-07 |
| RUMGNA_03853 | ABC transporter substrate-binding protein                        | -1.4  | 2.75E-02 | 1.23  | 3.51E-02 | 2.63  | 2.31E-07 |
| RUMGNA_03854 | Hypothetical protein                                             | -1.25 | 1.12E-01 | 1.09  | 8.44E-02 | 2.33  | 1.99E-05 |
| RUMGNA_03856 | sn-glycerol-3-phosphate ABC transporter ATP-binding protein UgpC | -0.85 | 5.24E-01 | 1     | 2.42E-01 | 1.85  | 1.27E-02 |
| RUMGNA_03862 | ABC transporter ATP-binding protein                              | 0.66  | 3.37E-02 | -0.89 | 3.47E-04 | -1.55 | 9.92E-12 |
| RUMGNA_03877 | Hypothetical protein                                             | 0.24  | 7.99E-01 | -2.52 | 5.39E-11 | -2.76 | 3.92E-13 |
| RUMGNA_03892 | Hypothetical protein                                             | 1.55  | 5.10E-05 | -0.56 | 1.81E-01 | -2.11 | 7.16E-10 |
| RUMGNA_03893 | DUF2500 domain-containing protein                                | 1.44  | 6.89E-05 | -0.36 | 3.80E-01 | -1.8  | 3.74E-08 |
| RUMGNA_03894 | helix-turn-helix domain-containing protein                       | 1.27  | 2.12E-03 | -0.27 | 5.68E-01 | -1.55 | 1.64E-05 |
| RUMGNA_03902 | serine/arginine repetitive matrix protein 2                      | -0.8  | 4.32E-01 | 0.89  | 2.08E-01 | 1.68  | 5.93E-03 |
| RUMGNA_03906 | antitoxin HicB                                                   | -1.69 | 3.18E-02 | 0.59  | 4.66E-01 | 2.28  | 2.30E-04 |
| RUMGNA_03917 | IS4 family transposase                                           | -1.07 | 2.04E-01 | 0.46  | 5.24E-01 | 1.53  | 8.14E-03 |
| RUMGNA_03958 | CdaR family transcriptional regulator                            | 0.24  | 7.90E-01 | -1.47 | 1.19E-04 | -1.71 | 5.90E-06 |
| RUMGNA_03959 | GntP family permease                                             | 2.14  | 5.53E-08 | -0.13 | 8.16E-01 | -2.27 | 1.42E-09 |
| RUMGNA_03960 | glycerate kinase                                                 | 1.77  | 1.49E-03 | -0.35 | 5.73E-01 | -2.13 | 1.23E-05 |
| RUMGNA_03961 | Hypothetical protein                                             | 2.41  | 8.40E-07 | 0.42  | 4.58E-01 | -1.99 | 2.45E-05 |
| RUMGNA_03962 | Hypothetical protein                                             | 1.45  | 5.30E-04 | -0.18 | 7.34E-01 | -1.62 | 1.24E-05 |

\*Condition A vs Condition B: genes with an up-regulated transcription in Condition A ( $\text{Log}_2\text{FC} > 1.5$  and  $\text{padj} < 0.05$ ) are highlighted in red while those with an up-regulated transcription in Condition B ( $\text{Log}_2\text{FC} < -1.5$  and  $\text{padj} < 0.05$ ) are highlighted in green.

\*\* $\text{Log}_2\text{FC}$ :  $\text{Log}_2(\text{Fold change in transcription level})$

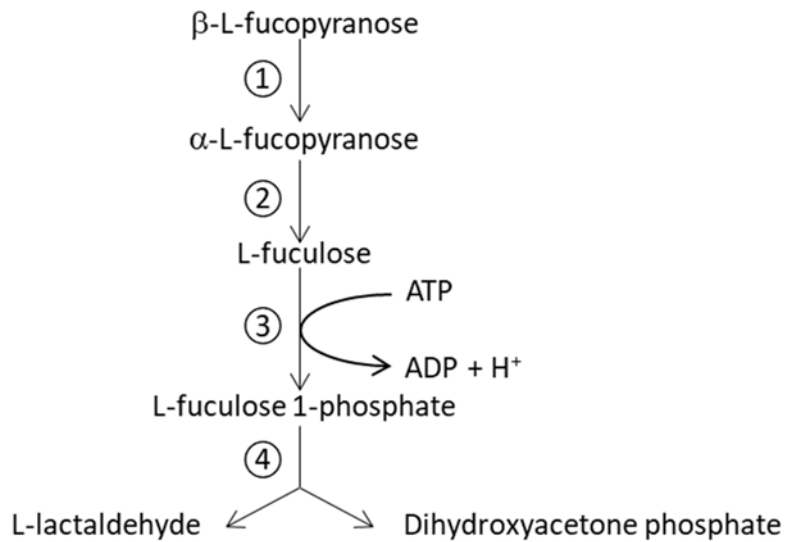

**Figure S1:** Schematic of fucose catabolism in bacteria

The steps are catalyzed by ①, L-fucose mutarotase (FucU); ②, L-fucose isomerase (FucI); ③, L-fuculokinase (FucK); ④, L-fuculose-1-phosphate aldolase (FucA). In *R. gnavus* ATCC 29149, these enzymes are encoded by RUMGNA\_01071, RUMGNA\_01070, RUMGNA\_01069 and RUMGNA\_01020. The genes encoding these enzymes are absent in the *R. bromii* L2-63 genome.

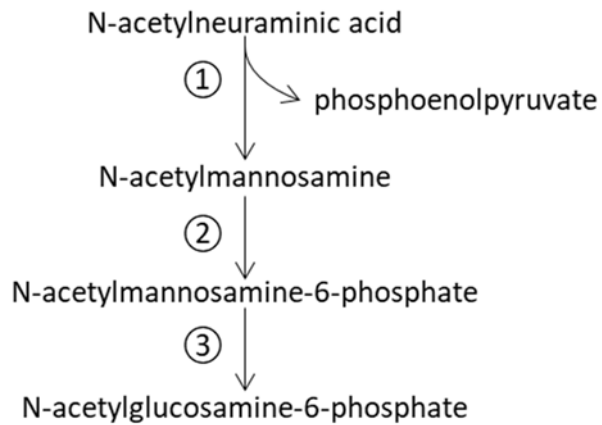

**Figure S2:** Schematic of sialic acid catabolism in bacteria

The steps are catalyzed by ①, N-acetylneuraminic acid lyase (NanA); ②, N-acetylmannosamine kinase (NanK); ③, N-acetylmannosamine-6-phosphate epimerase (NanE). In *R. gnavus* ATCC 29149, these enzymes are encoded by RUMGNA\_02692, RUMGNA\_02691 and RUMGNA\_02693. The genes encoding these enzymes are absent in *R. bromii* L2-63 genome.

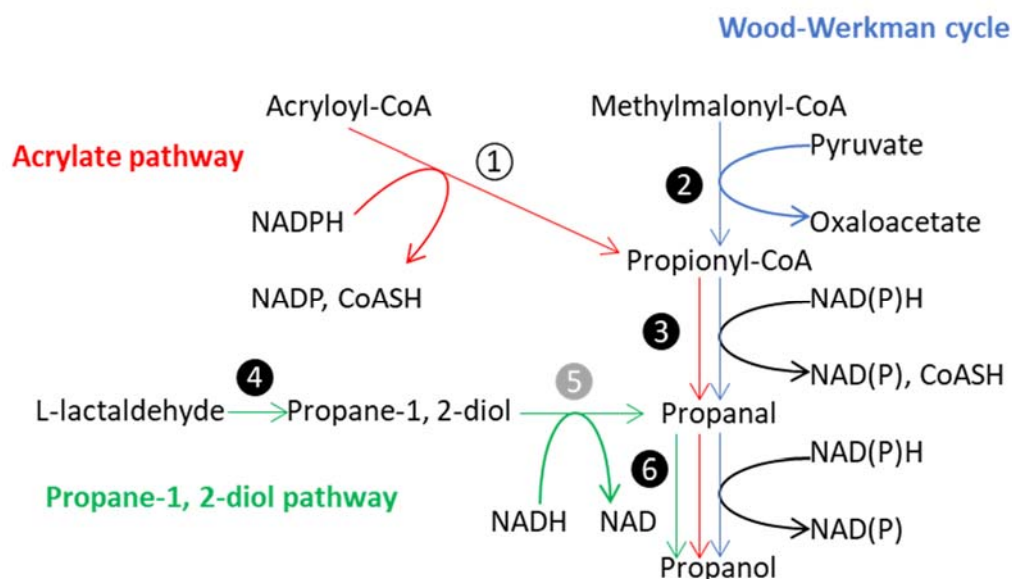

**Figure S3:** Propanol synthesis pathways in bacteria

Three propanol synthesis pathways have been described in bacteria. The enzymes involved in these pathways are numbered 1 to 6. White circle, enzyme absent in both *R. bromii* L2-63 and *R. gnavus* ATCC 29149; black circles, enzymes present in both *R. bromii* L2-63 and *R. gnavus* ATCC 29149; grey circle, enzyme present in *R. gnavus* ATCC 29149 only.

The first enzyme required in the acrylate pathway, in red, is the acryloyl-CoA reductase (①) which is absent in both *R. bromii* L2-63 and *R. gnavus* ATCC 29149. The Wood-Werkman cycle, in blue, requires the action of 3 successive enzymes: methylmalonyl-CoA carboxytransferase (②) encoded by L2-63\_01076 in *R. bromii* L2-63 and RUMGNA\_00341 in *R. gnavus* ATCC 29149, propanal dehydrogenase (③) encoded by L2-63\_00391 in *R. bromii* L2-63 and RUMGNA\_01022 in *R. gnavus* ATCC 29149 and propanol dehydrogenase (PduQ) (⑥) encoded by L2-63\_01124 in *R. bromii* L2-63 and RUMGNA\_01033 in *R. gnavus* ATCC 29149. For the propanediol pathway in green, two enzymes are needed in addition to ⑥: lactaldehyde reductase (④) encoded by RUMGNA\_02449 in *R. gnavus* ATCC 29149 and propanediol dehydratase (⑤) which contains 3 sub-units, PduCDE, encoded in *R. gnavus* ATCC 29149 by RUMGNA\_01191, 01190 and 01189, respectively. In *R. bromii* L2-63, although L2-63\_01124 is predicted to encode PduQ, the predicted protein also has high homology with ④; however, *R. bromii* L2-63 lacks genes coding for PduCDE, ruling out the presence of a propanediol pathway in this bacterium.
